# Supplementary material for: Monocyte Proteomics Reveals Involvement of Phosphorylated HSP27 in the Pathogenesis of Osteoporosis
Source: Dis Markers. 2015 May 7;2015:196589. doi: 10.1155/2015/196589 (PMC4439496; doi:10.1155/2015/196589)
Supplement: Supplementary file 1 — The differential proteins and their fold change, peptides and gene ontology information are shown in Supporting Information Table 1 [file 196589.f1.xlsx]

## Sheet: SET1
Supporting Information Table 1A- Differentially abundant proteins in monocytes in high BMD versus low BMD condition in premenopausal (115/114) and postmenopausal (117/116) women. The list includes 45 proteins ≥1.5 fold change, along with their peptide information, molecular, biological functions and localizations.
Protein Accessions	Gene Symbol	Protein Name	Unique Peptides	# PSMs	Fold change 115/114	115/114 Variability [%]	Fold change 117/116	117/116 Variability [%]	MW [kDa]	Coverage	Score	Localisation	Molecular Function	Biological process	Protein accessions	Confidence	Peptide Sequence	Modifications	XCorr	Δ Score	Rank	Quan Info	Quan Usage	115/114	117/116	Charge	m/z [Da]	MH+ [Da]	ΔM [ppm]
4502101	ANXA1	annexin A1 [Homo sapiens]	10	27	0.80443	15.1541	1.61254	10.8277	38.69	37.57	28.5903	Plasma membrane	Calcium ion binding	Cell communication,Signal transduction
															4502101	High	gGPGSAVSPYPTFNPSSDVAALHk	N-Term(iTRAQ4plex); K24(iTRAQ4plex)	7.7785	1	1	Unique	Used	0.594918	0.373437	3	882.12	2644.34	-6.45152
															4502101	High	mYGISLcQAILDETk	N-Term(iTRAQ4plex); C7(Methylthio); K15(iTRAQ4plex)	7.04379	1	1	Unique	Used	0.949032	0.700832	2	1010.02	2019.03	3.8967
															4502101	High	gLGTDEDTLIEILASR	N-Term(iTRAQ4plex)	6.98775	1	1	Unique	Used	0.794576	0.486644	2	923.992	1846.98	-5.72924
															4502101	High	gLGTDEDTLIEILASR	N-Term(iTRAQ4plex)	6.60549	1	1	Unique	Used	0.810546	0.361312	2	923.998	1846.99	0.417306
															4502101	High	mYGISLcQAILDETk	N-Term(iTRAQ4plex); C7(Methylthio); K15(iTRAQ4plex)	6.45144	1	1	Unique	Used	1.30863	0.774208	2	1010.01	2019.02	0.148182
															4502101	High	gGPGSAVSPYPTFNPSSDVAALHk	N-Term(iTRAQ4plex); K24(iTRAQ4plex)	6.15773	1	1	Unique	Used	0.789192	0.524829	4	661.843	2644.35	-4.54084
															4502101	High	gVDEATIIDILTk	N-Term(iTRAQ4plex); K13(iTRAQ4plex)	5.95087	1	1	Unique	Used	0.975368	0.524704	2	838.491	1675.97	1.38757
															4502101	High	mYGISLcQAILDETk	N-Term(iTRAQ4plex); C7(Methylthio); K15(iTRAQ4plex)	5.73045	1	1	Unique	Used	0.828643	0.719075	3	673.681	2019.03	3.9505
															4502101	High	sEDFGVNEDLADSDAR	N-Term(iTRAQ4plex)	5.44992	1	1	Unique	Used	0.91669	0.537666	2	942.418	1883.83	-5.02259
															4502101	High	sEDFGVNEDLADSDAR	N-Term(iTRAQ4plex)	5.41897	1	1	Unique	Used	0.991992	0.564698	2	942.419	1883.83	-3.27301
															4502101	High	gLGTDEDTLIEILASR	N-Term(iTRAQ4plex)	5.10671	1	1	Unique	Used			3	616.331	1846.98	-5.33997
															4502101	High	gLGTDEDTLIEILASR	N-Term(iTRAQ4plex)	5.10633	1	1	Unique	Used	1.37726	1.09767	3	616.336	1846.99	2.88845
															4502101	High	mYGISLcQAILDETk	N-Term(iTRAQ4plex); C7(Methylthio); K15(iTRAQ4plex)	4.89428	1	1	Unique	Used	0.821729	0.884355	3	673.681	2019.03	3.58774
															4502101	High	mYGISLcQAILDETk	N-Term(iTRAQ4plex); C7(Methylthio); K15(iTRAQ4plex)	4.89128	1	1	Unique	Used	0.965468	0.888918	3	673.678	2019.02	-0.584001
															4502101	High	kGTDVNVFNTILTTR	K1(iTRAQ4plex); N-Term(iTRAQ4plex)	4.66508	1	1	Unique	Used	0.570687	0.665779	3	656.375	1967.11	-2.49702
															4502101	High	dITSDTSGDFR	N-Term(iTRAQ4plex)	4.45272	1	1	Unique	Used	0.797384	0.393374	2	679.32	1357.63	-1.76351
															4502101	High	gTDVNVFNTILTTR	N-Term(iTRAQ4plex)	4.44986	1	1	Unique	Used	0.764381	0.559205	2	847.96	1694.91	-3.63953
															4502101	High	gTDVNVFNTILTTR	N-Term(iTRAQ4plex)	4.36809	1	1	Unique	Used	1.04774	0.90755	2	847.962	1694.92	-2.12708
															4502101	High	gTDVNVFNTILTTR	N-Term(iTRAQ4plex)	4.13915	1	1	Unique	Used	0.859203	0.619709	2	847.961	1694.91	-2.99134
															4502101	High	dITSDTSGDFR	N-Term(iTRAQ4plex)	4.09962	1	1	Unique	Used	0.788483	0.484591	2	679.32	1357.63	-2.39291
															4502101	High	gVDEATIIDILTk	N-Term(iTRAQ4plex); K13(iTRAQ4plex)	4.05217	1	1	Unique	Used	0.682138	0.603389	3	559.329	1675.97	0.942536
															4502101	High	gVDEATIIDILTk	N-Term(iTRAQ4plex); K13(iTRAQ4plex)	3.95057	1	1	Unique	Used	0.963498	1.01204	3	559.326	1675.96	-5.06642
															4502101	High	tPAQFDADELR	N-Term(iTRAQ4plex)	3.82643	1	1	Unique	Used	0.848943	0.465913	2	703.853	1406.7	-3.89764
															4502101	High	sEDFGVNEDLADSDAR	N-Term(iTRAQ4plex)	3.80733	1	1	Unique	Used	0.870292	0.593052	2	942.421	1883.83	-1.91223
															4502101	High	tPAQFDADELR	N-Term(iTRAQ4plex)	3.70181	1	1	Unique	Used	0.917144	0.46463	2	703.854	1406.7	-1.90174
															4502101	High	sEIDMNDIk	N-Term(iTRAQ4plex); K9(iTRAQ4plex)	3.29553	1	1	Unique	Used	0.810762	0.428243	2	676.848	1352.69	-6.65447
															4502101	High	dITSDTSGDFR	N-Term(iTRAQ4plex)	2.8824	1	1	Unique	Used	0.776035	0.569059	2	679.311	1357.62	-14.4416
4504321	HIST1H4I	histone H4 [Homo sapiens]	6	35	1.11931	1.64905	1.60322	13.428	11.3604	51.46	77.4802	Nucleus	DNA binding	Regulation of nucleobase, nucleoside, nucleotide and nucleic acid metabolism
															4504321	High	kTVTAMDVVYALk	K1(iTRAQ4plex); N-Term(iTRAQ4plex); K13(iTRAQ4plex)	6.20449	1	1	Unique	Used	1.22006	0.730691	2	936.052	1871.1	-3.77591
															4504321	High	tVTAMDVVYALk	N-Term(iTRAQ4plex); K12(iTRAQ4plex)	5.57449	1	1	Unique	Used	1.26457	0.785976	2	799.953	1598.9	-4.41151
															4504321	High	tVTAMDVVYALk	N-Term(iTRAQ4plex); K12(iTRAQ4plex)	5.55976	1	1	Unique	Used	1.11429	0.544735	2	799.956	1598.9	-1.58669
															4504321	High	tVTAMDVVYALk	N-Term(iTRAQ4plex); K12(iTRAQ4plex)	5.42726	1	1	Unique	Used	1.12946	0.674548	2	799.955	1598.9	-3.03727
															4504321	High	tVTAMDVVYALk	N-Term(iTRAQ4plex); K12(iTRAQ4plex)	5.36664	1	1	Unique	Used	0.913521	0.486788	2	799.958	1598.91	1.00908
															4504321	High	kTVTAMDVVYALk	K1(iTRAQ4plex); N-Term(iTRAQ4plex); K13(iTRAQ4plex)	5.20216	1	1	Unique	Used	1.36172	0.816285	3	624.373	1871.11	0.881563
															4504321	High	tVTAmDVVYALk	N-Term(iTRAQ4plex); M5(Oxidation); K12(iTRAQ4plex)	4.75689	1	1	Unique	Used	1.02061	0.490493	2	807.954	1614.9	-0.387513
															4504321	High	tVTAMDVVYALk	N-Term(iTRAQ4plex); K12(iTRAQ4plex)	4.63072	1	1	Unique	Used	1.01875	0.626531	2	799.956	1598.9	-1.434
															4504321	High	dNIQGITkPAIR	N-Term(iTRAQ4plex); K8(iTRAQ4plex)	4.61754	1	1	Unique	Used	1.18387	0.520109	2	807.48	1613.95	-3.60321
															4504321	High	tVTAMDVVYALk	N-Term(iTRAQ4plex); K12(iTRAQ4plex)	4.43528	1	1	Unique	Used	1.48997	0.860274	3	533.636	1598.89	-7.70285
															4504321	High	dAVTYTEHAk	N-Term(iTRAQ4plex); K10(iTRAQ4plex)	4.2787	1	1	Unique	Used	1.53054	0.889354	3	474.921	1422.75	0.343867
															4504321	High	kTVTAMDVVYALk	K1(iTRAQ4plex); N-Term(iTRAQ4plex); K13(iTRAQ4plex)	4.1619	1	1	Unique	Used	1.31887	0.910696	4	468.529	1871.09	-5.55177
															4504321	High	iSGLIYEETR	N-Term(iTRAQ4plex)	3.67556	1	1	Unique	Used	1.3065	0.815133	2	662.872	1324.74	9.9622
															4504321	High	iSGLIYEETR	N-Term(iTRAQ4plex)	3.66134	1	1	Unique	Used	1.18066	0.821709	2	662.871	1324.74	9.13288
															4504321	High	iSGLIYEETR	N-Term(iTRAQ4plex)	3.63778	1	1	Unique	Used	1.23239	0.661561	2	662.862	1324.72	-4.41278
															4504321	High	iSGLIYEETR	N-Term(iTRAQ4plex)	3.6311	1	1	Unique	Used	1.29	0.699669	2	662.864	1324.72	-1.18759
															4504321	High	iSGLIYEETR	N-Term(iTRAQ4plex)	3.55844	1	1	Unique	Used	1.03255	0.666577	2	662.864	1324.72	-1.37189
															4504321	High	iSGLIYEETR	N-Term(iTRAQ4plex)	3.47895	1	1	Unique	Used	1.12089	0.847566	2	662.867	1324.73	2.59047
															4504321	High	iSGLIYEETR	N-Term(iTRAQ4plex)	3.43805	1	1	Unique	Used	1.06991	0.706889	2	662.871	1324.73	8.58001
															4504321	High	vFLENVIR	N-Term(iTRAQ4plex)	3.37388	1	1	Unique	Used	1.04391	0.677544	2	567.348	1133.69	7.55927
															4504321	High	iSGLIYEETR	N-Term(iTRAQ4plex)	3.36144	1	1	Unique	Used	1.28874	0.86171	2	662.872	1324.74	10.0543
															4504321	High	vFLENVIR	N-Term(iTRAQ4plex)	3.29017	1	1	Unique	Used	0.96374	0.603915	2	567.35	1133.69	11.4355
															4504321	High	tVTAMDVVYALk	N-Term(iTRAQ4plex); K12(iTRAQ4plex)	3.28948	1	1	Unique	Used	1.22485	0.755226	3	533.639	1598.9	-3.12203
															4504321	High	iSGLIYEETR	N-Term(iTRAQ4plex)	3.25184	1	1	Unique	Used	1.11656	0.733919	2	662.864	1324.72	-1.55618
															4504321	High	vFLENVIR	N-Term(iTRAQ4plex)	3.2501	1	1	Unique	Used	0.943578	0.588369	2	567.349	1133.69	8.74369
															4504321	High	vFLENVIR	N-Term(iTRAQ4plex)	3.21746	1	1	Unique	Used	1.1154	0.569772	2	567.343	1133.68	-1.16244
															4504321	High	iSGLIYEETR	N-Term(iTRAQ4plex)	3.19734	1	1	Unique	Used	1.09002	0.711403	2	662.865	1324.72	0.286777
															4504321	High	vFLENVIR	N-Term(iTRAQ4plex)	3.15593	1	1	Unique	Used	0.897281	0.410323	2	567.343	1133.68	-1.59315
															4504321	High	iSGLIYEETR	N-Term(iTRAQ4plex)	3.15474	1	1	Unique	Used	1.11748	0.793441	2	662.864	1324.72	-2.38551
															4504321	High	iSGLIYEETR	N-Term(iTRAQ4plex)	3.12712	1	1	Unique	Used	1.05807	0.626613	2	662.865	1324.72	0.0103338
															4504321	High	vFLENVIR	N-Term(iTRAQ4plex)	3.08938	1	1	Unique	Used	1.02079	0.518384	2	567.343	1133.68	-1.8085
															4504321	High	tVTAMDVVYALk	N-Term(iTRAQ4plex); K12(iTRAQ4plex)	3.05841	1	1	Unique	Used	1.01748	0.436163	3	533.64	1598.9	-1.1752
															4504321	High	iSGLIYEETR	N-Term(iTRAQ4plex)	2.99416	1	1	Unique	Used	1.05757	0.708653	2	662.866	1324.73	1.76114
															4504321	High	vFLENVIR	N-Term(iTRAQ4plex)	2.8441	1	1	Unique	Used	0.980281	0.611543	2	567.343	1133.68	-1.37779
4504517	HSPB1	heat shock protein beta-1 [Homo sapiens]	6	9	0.666336	23.8846	0.726001	14.9803	22.7685	33.17	17.8833	Cytoplasm	Chaperone activity	Protein metabolism
															4504517	High	vFLENVIR	N-Term(iTRAQ4plex)	2.70175	1	1	Unique	Used	0.822477	0.794185	2	567.343	1133.68	-1.05476
															4504517	High	kYTLPPGVDPTQVSSSLSPEGTLTVEAPMPk	K1(iTRAQ4plex); N-Term(iTRAQ4plex); K31(iTRAQ4plex)	6.98529	1	1	Unique	Used	0.815703	1.01818	3	1220.32	3658.95	-1.93208
															4504517	High	kYTLPPGVDPTQVSSSLSPEGTLTVEAPMPk	K1(iTRAQ4plex); N-Term(iTRAQ4plex); K31(iTRAQ4plex)	6.31514	1	1	Unique	Used		1.94611	3	1220.32	3658.95	-3.43338
															4504517	High	yTLPPGVDPTQVSSSLSPEGTLTVEAPMPk	N-Term(iTRAQ4plex); K30(iTRAQ4plex)	4.93142	1	1	Unique	Used	0.35057	0.658922	3	1129.61	3386.8	10.8194
															4504517	High	vSLDVNHFAPDELTVk	N-Term(iTRAQ4plex); K16(iTRAQ4plex)	4.89853	1	1	Unique	Used	0.84221	1.28764	3	691.378	2072.12	-4.04273
															4504517	High	tkDGVVEITGk	N-Term(iTRAQ4plex); K2(iTRAQ4plex); K11(iTRAQ4plex)	4.86435	1	1	Unique	Used	0.799183	1.09686	2	789.972	1578.94	-3.82358
															4504517	High	vSLDVNHFAPDELTVk	N-Term(iTRAQ4plex); K16(iTRAQ4plex)	4.58283	1	1	Unique	Used	0.499563	0.570804	3	691.379	2072.12	-2.0103
															4504517	High	dGVVEITGk	N-Term(iTRAQ4plex); K9(iTRAQ4plex)	3.6969	1	1	Unique	Used	0.639235	0.815145	2	603.349	1205.69	-5.74746
															4504517	High	lFDQAFGLPR	N-Term(iTRAQ4plex)	3.57462	1	1	Unique	Used	0.708357	1.40048	2	654.365	1307.72	-0.0522901
															4504517	High	lFDQAFGLPR	N-Term(iTRAQ4plex)	3.35303	1	1	Unique	Used	0.686445	1.21908	2	654.363	1307.72	-2.66598
4506549	RNASE2	non-secretory ribonuclease precursor [Homo sapiens]	2	4	0.900716	18.856	1.69274	34.8607	18.3421	19.88	14.101	Extracellular	Ribonuclease activity	Regulation of nucleobase, nucleoside, nucleotide and nucleic acid metabolism
															4506549	High	yAQTPANMFYIVAcDNR	N-Term(iTRAQ4plex); C14(Methylthio)	5.41505	1	1	Unique	Used	1.02081	0.600638	2	1083.99	2166.98	-5.01446
															4506549	High	rDPPQYPVVPVHLDR	N-Term(iTRAQ4plex)	5.16729	1	1	Unique	Used	0.939547	0.875238	3	644.695	1932.07	6.83434
															4506549	High	rDPPQYPVVPVHLDR	N-Term(iTRAQ4plex)	4.87573	1	1	Unique	Used	0.656559	0.707652	4	483.773	1932.07	7.58555
															4506549	High	rDPPQYPVVPVHLDR	N-Term(iTRAQ4plex)	4.05798	1	1	Unique	Used	0.780622	0.436944	2	966.539	1932.07	7.09402
4506715	RPS28	40S ribosomal protein S28 [Homo sapiens]	1	1	1.38945		1.19172		7.8362	17.39	2.92848	Ribosome	Structural constituent of ribosome	Protein metabolism
															4506715	High	eGDVLTLLESER	N-Term(iTRAQ4plex)	2.92848	1	1	Unique	Used	1.38945	0.867683	2	752.9	1504.79	-3.52233
4557894	LYZ	lysozyme C precursor [Homo sapiens]	4	19	1.0764	23.1708	1.55063	36.028	16.5263	39.86	78.5747	Extracellular	Hydrolase activity	Metabolism,Energy pathways
															4557894	High	tPGAVNAcHLScSALLQDNIADAVAcAk	N-Term(iTRAQ4plex); C8(Methylthio); C12(Methylthio); C26(Methylthio); K28(iTRAQ4plex)	10.0392	1	1	Unique	Used	0.977543	0.350556	3	1061.5	3182.49	2.45469
															4557894	High	tPGAVNAcHLScSALLQDNIADAVAcAk	N-Term(iTRAQ4plex); C8(Methylthio); C12(Methylthio); C26(Methylthio); K28(iTRAQ4plex)	9.87349	1	1	Unique	Used	1.22135	0.612593	3	1061.5	3182.49	0.728635
															4557894	High	tPGAVNAcHLScSALLQDNIADAVAcAk	N-Term(iTRAQ4plex); C8(Methylthio); C12(Methylthio); C26(Methylthio); K28(iTRAQ4plex)	9.2171	1	1	Unique	Used	0.934369	0.252638	3	1061.5	3182.49	0.958777
															4557894	High	tPGAVNAcHLScSALLQDNIADAVAcAk	N-Term(iTRAQ4plex); C8(Methylthio); C12(Methylthio); C26(Methylthio); K28(iTRAQ4plex)	8.93069	1	1	Unique	Used	1.11219	0.615583	3	1061.5	3182.48	-0.191931
															4557894	High	tPGAVNAcHLScSALLQDNIADAVAcAk	N-Term(iTRAQ4plex); C8(Methylthio); C12(Methylthio); C26(Methylthio); K28(iTRAQ4plex)	7.33631	1	1	Unique	Used	0.938586	0.807574	3	1061.5	3182.49	2.33962
															4557894	High	tPGAVNAcHLScSALLQDNIADAVAcAk	N-Term(iTRAQ4plex); C8(Methylthio); C12(Methylthio); C26(Methylthio); K28(iTRAQ4plex)	7.24431	1	1	Unique	Used	1.31327	0.635339	4	796.377	3182.49	1.12716
															4557894	High	tPGAVNAcHLScSALLQDNIADAVAcAk	N-Term(iTRAQ4plex); C8(Methylthio); C12(Methylthio); C26(Methylthio); K28(iTRAQ4plex)	7.12472	1	1	Unique	Used	1.5591	0.54072	4	796.376	3182.48	-0.713975
															4557894	High	tPGAVNAcHLScSALLQDNIADAVAcAk	N-Term(iTRAQ4plex); C8(Methylthio); C12(Methylthio); C26(Methylthio); K28(iTRAQ4plex)	6.67713	1	1	Unique	Used	1.41795		4	796.377	3182.48	0.283306
															4557894	High	tPGAVNAcHLScSALLQDNIADAVAcAk	N-Term(iTRAQ4plex); C8(Methylthio); C12(Methylthio); C26(Methylthio); K28(iTRAQ4plex)	6.47562	1	1	Unique	Used	0.689065		4	796.377	3182.49	1.05044
															4557894	High	tPGAVNAcHLScSALLQDNIADAVAcAk	N-Term(iTRAQ4plex); C8(Methylthio); C12(Methylthio); C26(Methylthio); K28(iTRAQ4plex)	5.95294	1	1	Unique	Used	2.12142		5	637.303	3182.48	0.317438
															4557894	High	tPGAVNAcHLScSALLQDNIADAVAcAk	N-Term(iTRAQ4plex); C8(Methylthio); C12(Methylthio); C26(Methylthio); K28(iTRAQ4plex)	5.38413	1	1	Unique	Used	1.12263	0.33734	2	1591.75	3182.49	2.09453
															4557894	High	tPGAVNAcHLScSALLQDNIADAVAcAk	N-Term(iTRAQ4plex); C8(Methylthio); C12(Methylthio); C26(Methylthio); K28(iTRAQ4plex)	5.23322	1	1	Unique	Used	0.855541	0.610442	3	1061.5	3182.48	-0.0768597
															4557894	High	tPGAVNAcHLScSALLQDNIADAVAcAk	N-Term(iTRAQ4plex); C8(Methylthio); C12(Methylthio); C26(Methylthio); K28(iTRAQ4plex)	5.20298	1	1	Unique	Used	2.7373	1.17267	5	637.302	3182.48	-1.12095
															4557894	High	tPGAVNAcHLScSALLQDNIADAVAcAk	N-Term(iTRAQ4plex); C8(Methylthio); C12(Methylthio); C26(Methylthio); K28(iTRAQ4plex)	4.93903	1	1	Unique	Used	0.682579	0.40224	4	796.374	3182.47	-2.93868
															4557894	High	sTDYGIFQINSR	N-Term(iTRAQ4plex)	4.42821	1	1	Unique	Used	1.27937	0.480214	2	772.894	1544.78	-1.61667
															4557894	High	sTDYGIFQINSR	N-Term(iTRAQ4plex)	4.25519	1	1	Unique	Used	1.11671	0.467424	2	772.893	1544.78	-2.01178
															4557894	High	gISLANWMcLAk	N-Term(iTRAQ4plex); C9(Methylthio); K12(iTRAQ4plex)	3.8666	1	1	Unique	Used	1.54253	0.380223	3	547.625	1640.86	1.59472
															4557894	High	gISLANWMcLAk	N-Term(iTRAQ4plex); C9(Methylthio); K12(iTRAQ4plex)	3.59339	1	1	Unique	Used	1.0895	0.480038	3	547.622	1640.85	-2.98053
															4557894	High	yWcNDGk	N-Term(iTRAQ4plex); C3(Methylthio); K7(iTRAQ4plex)	2.92803	1	1	Unique	Used	1.21325	0.514013	2	610.275	1219.54	-3.9539
4758146	DEFA1	neutrophil defensin 1 preproprotein [Homo sapiens]	1	1	0.359209		1.49903		10.1942	9.57	3.3539	Cytoplasm	Defense/immunity protein activity	Immune response
															4758146	High	yGTcIYQGR	N-Term(iTRAQ4plex); C4(Methylthio)	3.3539	1	1	Unique	Used	0.359209	0.609083	2	625.793	1250.58	0.0664958
4885381	HIST1H1B	histone H1.5 [Homo sapiens]	1	1	1.01494		1.8896		22.5665	4.87	4.82548	Nucleus	DNA binding	Regulation of nucleobase, nucleoside, nucleotide and nucleic acid metabolism
															4885381	High	aLAAGGYDVEk	N-Term(iTRAQ4plex); K11(iTRAQ4plex)	4.82548	1	1	Unique	Used	1.01494	0.485382	2	691.378	1381.75	-5.71195
5803048	KDELR1	ER lumen protein retaining receptor 1 [Homo sapiens]	1	2	0.945177		0.588981		24.526	8.96	12.9932	Endoplasmic reticulum	Protein binding,Molecular function unknown	Transport,Protein transport
															5803048	High	tGEAETITSHYLFALGVYR	N-Term(iTRAQ4plex)	6.57041	1	1	Unique	Used	1.01018	1.73099	3	758.06	2272.17	-3.36018
															5803048	High	tGEAETITSHYLFALGVYR	N-Term(iTRAQ4plex)	6.4228	1	1	Unique	Used	0.884352	1.90977	3	758.061	2272.17	-1.82903
9845511	RAC1	ras-related C3 botulinum toxin substrate 1 isoform Rac1 [Homo sapiens]	3	10	1.58253	27.5415	0.773722	13.7666	21.4362	30.21	14.1959	Cytoplasm	GTPase activity	Cell communication,Signal transduction
															9845511	High	kLTPITYPQGLAMAk	K1(iTRAQ4plex); N-Term(iTRAQ4plex); K15(iTRAQ4plex)	6.19925	1	1	Unique	Used	1.99142	2.32203	2	1032.61	2064.22	-4.27964
															9845511	High	hHcPNTPIILVGTk	N-Term(iTRAQ4plex); C3(Methylthio); K14(iTRAQ4plex)	5.64012	1	1	Unique	Used	1.15263	1.25881	3	622.01	1864.01	-1.72793
															9845511	High	hHcPNTPIILVGTk	N-Term(iTRAQ4plex); C3(Methylthio); K14(iTRAQ4plex)	5.28757	1	1	Unique	Used	1.09602	1.24577	2	932.51	1864.01	-2.99773
															9845511	High	lTPITYPQGLAMAk	N-Term(iTRAQ4plex); K14(iTRAQ4plex)	4.86374	1	1	Unique	Used	1.96014	2.07108	2	896.515	1792.02	-2.5391
															9845511	High	cVVVGDGAVGk	C1(Methylthio); N-Term(iTRAQ4plex); K11(iTRAQ4plex)	4.00515	1	1	Not Unique	Not Used	1.12927	1.08663	2	669.358	1337.71	-5.48889
															9845511	High	yLEcSALTQR	N-Term(iTRAQ4plex); C4(Methylthio)	3.30951	1	1	Not Unique	Not Used	1.49066	1.55728	2	687.336	1373.66	-2.57657
															9845511	High	tVFDEAIR	N-Term(iTRAQ4plex)	3.17431	1	1	Not Unique	Not Used	0.936206	0.982041	2	547.801	1094.59	-1.37963
															9845511	High	lTPITYPQGLAMAk	N-Term(iTRAQ4plex); K14(iTRAQ4plex)	3.10173	1	1	Unique	Used	1.35915	1.16088	3	598.013	1792.02	-2.47849
															9845511	High	tVFDEAIR	N-Term(iTRAQ4plex)	3.09643	1	1	Not Unique	Not Used	0.869322	0.928647	2	547.801	1094.59	-1.7142
															9845511	High	yLEcSALTQR	N-Term(iTRAQ4plex); C4(Methylthio)	3.0561	1	1	Not Unique	Not Used	1.27927	1.37181	2	687.336	1373.67	-1.33246
10800138	HIST1H2BD	histone H2B type 1-D [Homo sapiens]	2	21	1.13501	24.8466	2.52914	6.95728	13.9276	35.71	36.608	Nucleus	DNA binding	Chromosome organization and biogenesis (sensu Eukarya)
															10800138	High	aMGIMNSFVNDIFER	N-Term(iTRAQ4plex)	6.40898	1	1	Not Unique	Not Used	1.07226	0.637844	3	629.979	1887.92	1.2108
															10800138	High	aMGIMNSFVNDIFER	N-Term(iTRAQ4plex)	6.26216	1	1	Not Unique	Not Used	1.119	0.410048	2	944.459	1887.91	-5.63591
															10800138	High	aMGIMNSFVNDIFER	N-Term(iTRAQ4plex)	6.14594	1	1	Not Unique	Not Used	1.20705	0.47302	2	944.47	1887.93	6.06728
															10800138	High	aMGIMNSFVNDIFER	N-Term(iTRAQ4plex)	6.06392	1	1	Not Unique	Not Used	1.1714	0.392652	2	944.465	1887.92	0.959293
															10800138	High	aMGIMNSFVNDIFER	N-Term(iTRAQ4plex)	5.97307	1	1	Not Unique	Not Used	1.14937	0.383498	2	944.466	1887.92	1.73519
															10800138	High	aMGIMNSFVNDIFER	N-Term(iTRAQ4plex)	5.95042	1	1	Not Unique	Not Used	0.967213	0.284189	2	944.465	1887.92	1.02395
															10800138	High	aMGIMNSFVNDIFER	N-Term(iTRAQ4plex)	5.81218	1	1	Not Unique	Not Used	0.944036	0.319255	2	944.46	1887.91	-4.27807
															10800138	High	amGIMNSFVNDIFER	N-Term(iTRAQ4plex); M2(Oxidation)	5.64415	1	1	Not Unique	Not Used	1.12741	0.479916	2	952.46	1903.91	-1.50719
															10800138	High	aMGIMNSFVNDIFER	N-Term(iTRAQ4plex)	5.52606	1	1	Not Unique	Not Used	0.80115	0.618244	3	629.982	1887.93	6.06016
															10800138	High	amGIMNSFVNDIFER	N-Term(iTRAQ4plex); M2(Oxidation)	5.3319	1	1	Not Unique	Not Used	1.08504	0.596104	2	952.462	1903.92	0.223931
															10800138	High	aMGIMNSFVNDIFER	N-Term(iTRAQ4plex)	5.16214	1	1	Not Unique	Not Used	0.852993	0.458592	3	629.979	1887.92	1.30779
															10800138	High	aMGIMNSFVNDIFER	N-Term(iTRAQ4plex)	5.15673	1	1	Not Unique	Not Used	1.50214		3	629.979	1887.92	1.01683
															10800138	High	qVHPDTGISSk	N-Term(iTRAQ4plex); K11(iTRAQ4plex)	5.1047	1	1	Not Unique	Not Used	1.12493	0.394754	3	486.269	1456.79	-4.80301
															10800138	High	aMGIMNSFVNDIFER	N-Term(iTRAQ4plex)	4.93537	1	1	Not Unique	Not Used	1.06527	0.333644	3	629.976	1887.91	-4.12354
															10800138	High	qVHPDTGISSk	N-Term(iTRAQ4plex); K11(iTRAQ4plex)	4.70889	1	1	Not Unique	Not Used	1.3141	0.341576	3	486.271	1456.8	0.0360894
															10800138	High	amGIMNSFVNDIFER	N-Term(iTRAQ4plex); M2(Oxidation)	4.67422	1	1	Not Unique	Not Used	0.960609	0.542154	2	952.456	1903.9	-6.25176
															10800138	High	aMGImNSFVNDIFER	N-Term(iTRAQ4plex); M5(Oxidation)	4.16319	1	1	Not Unique	Not Used	1.02209	0.461503	2	952.46	1903.91	-2.02011
															10800138	High	kESYSVYVYk	K1(iTRAQ4plex); N-Term(iTRAQ4plex); K10(iTRAQ4plex)	4.0276	1	1	Unique	Used	1.33442	0.423948	2	849.474	1697.94	-4.52633
															10800138	High	eSYSVYVYk	N-Term(iTRAQ4plex); K9(iTRAQ4plex)	3.92122	1	1	Unique	Used	0.935596	0.336851	2	713.375	1425.74	-5.63926
															10800138	High	aMGImNSFVNDIFER	N-Term(iTRAQ4plex); M5(Oxidation)	3.31149	1	1	Not Unique	Not Used	0.714905	0.518943	3	635.308	1903.91	-3.18126
															10800138	High	lLLPGELAk	N-Term(iTRAQ4plex); K9(iTRAQ4plex)	3.06349	1	1	Not Unique	Not Used	1.14344	0.7701	2	621.402	1241.8	-8.45456
10800140	HIST1H2BB	histone H2B type 1-B [Homo sapiens]	1	20	1.20712		2.75587		13.9416	35.71	36.608	Nucleus	DNA binding	Regulation of nucleobase, nucleoside, nucleotide and nucleic acid metabolism
															10800140	High	aMGIMNSFVNDIFER	N-Term(iTRAQ4plex)	6.40898	1	1	Not Unique	Not Used	1.07226	0.637844	3	629.979	1887.92	1.2108
															10800140	High	aMGIMNSFVNDIFER	N-Term(iTRAQ4plex)	6.26216	1	1	Not Unique	Not Used	1.119	0.410048	2	944.459	1887.91	-5.63591
															10800140	High	aMGIMNSFVNDIFER	N-Term(iTRAQ4plex)	6.14594	1	1	Not Unique	Not Used	1.20705	0.47302	2	944.47	1887.93	6.06728
															10800140	High	aMGIMNSFVNDIFER	N-Term(iTRAQ4plex)	6.06392	1	1	Not Unique	Not Used	1.1714	0.392652	2	944.465	1887.92	0.959293
															10800140	High	aMGIMNSFVNDIFER	N-Term(iTRAQ4plex)	5.97307	1	1	Not Unique	Not Used	1.14937	0.383498	2	944.466	1887.92	1.73519
															10800140	High	aMGIMNSFVNDIFER	N-Term(iTRAQ4plex)	5.95042	1	1	Not Unique	Not Used	0.967213	0.284189	2	944.465	1887.92	1.02395
															10800140	High	aMGIMNSFVNDIFER	N-Term(iTRAQ4plex)	5.81218	1	1	Not Unique	Not Used	0.944036	0.319255	2	944.46	1887.91	-4.27807
															10800140	High	amGIMNSFVNDIFER	N-Term(iTRAQ4plex); M2(Oxidation)	5.64415	1	1	Not Unique	Not Used	1.12741	0.479916	2	952.46	1903.91	-1.50719
															10800140	High	aMGIMNSFVNDIFER	N-Term(iTRAQ4plex)	5.52606	1	1	Not Unique	Not Used	0.80115	0.618244	3	629.982	1887.93	6.06016
															10800140	High	amGIMNSFVNDIFER	N-Term(iTRAQ4plex); M2(Oxidation)	5.3319	1	1	Not Unique	Not Used	1.08504	0.596104	2	952.462	1903.92	0.223931
															10800140	High	aMGIMNSFVNDIFER	N-Term(iTRAQ4plex)	5.16214	1	1	Not Unique	Not Used	0.852993	0.458592	3	629.979	1887.92	1.30779
															10800140	High	aMGIMNSFVNDIFER	N-Term(iTRAQ4plex)	5.15673	1	1	Not Unique	Not Used	1.50214		3	629.979	1887.92	1.01683
															10800140	High	qVHPDTGISSk	N-Term(iTRAQ4plex); K11(iTRAQ4plex)	5.1047	1	1	Not Unique	Not Used	1.12493	0.394754	3	486.269	1456.79	-4.80301
															10800140	High	aMGIMNSFVNDIFER	N-Term(iTRAQ4plex)	4.93537	1	1	Not Unique	Not Used	1.06527	0.333644	3	629.976	1887.91	-4.12354
															10800140	High	qVHPDTGISSk	N-Term(iTRAQ4plex); K11(iTRAQ4plex)	4.70889	1	1	Not Unique	Not Used	1.3141	0.341576	3	486.271	1456.8	0.0360894
															10800140	High	amGIMNSFVNDIFER	N-Term(iTRAQ4plex); M2(Oxidation)	4.67422	1	1	Not Unique	Not Used	0.960609	0.542154	2	952.456	1903.9	-6.25176
															10800140	High	aMGImNSFVNDIFER	N-Term(iTRAQ4plex); M5(Oxidation)	4.16319	1	1	Not Unique	Not Used	1.02209	0.461503	2	952.46	1903.91	-2.02011
															10800140	High	kESYSIYVYk	K1(iTRAQ4plex); N-Term(iTRAQ4plex); K10(iTRAQ4plex)	4.06611	1	1	Unique	Used	1.20712	0.407397	2	856.482	1711.96	-3.79083
															10800140	High	aMGImNSFVNDIFER	N-Term(iTRAQ4plex); M5(Oxidation)	3.31149	1	1	Not Unique	Not Used	0.714905	0.518943	3	635.308	1903.91	-3.18126
															10800140	High	lLLPGELAk	N-Term(iTRAQ4plex); K9(iTRAQ4plex)	3.06349	1	1	Not Unique	Not Used	1.14344	0.7701	2	621.402	1241.8	-8.45456
20270303	RHOT2	mitochondrial Rho GTPase 2 [Homo sapiens]	2	2	1.50668	52.6246	0.741979	47.2363	68.0747	6.31	7.42754	Mitochondrion	GTPase activity	Cell communication,Signal transduction
															20270303	High	vPTHIVDYSEAEQTDEELREEIHk	N-Term(iTRAQ4plex); K24(iTRAQ4plex)	7.42754	1	1	Unique	Used	2.06733	2.23176	5	631.92	3155.57	-1.37064
															20270303	High	aVLHPTAPLYDPEAk	N-Term(iTRAQ4plex); K15(iTRAQ4plex)	6.74183	1	1	Unique	Used	0.946023	0.855469	3	637.357	1910.06	-2.66905
22035620	PYCARD	apoptosis-associated speck-like protein containing a CARD isoform b [Homo sapiens]	2	3	1.18626		1.38433	60.2173	19.9564	17.61	10.8002	Cytoplasm	Caspase activator activity	Apoptosis
															22035620	High	vTNVEWLLDALYGk	N-Term(iTRAQ4plex); K14(iTRAQ4plex)	5.85172	1	1	Unique	Used	1.18927	0.5223	2	955.04	1909.07	2.52157
															22035620	High	vTNVEWLLDALYGk	N-Term(iTRAQ4plex); K14(iTRAQ4plex)	4.94847	1	1	Unique	Used	1.18324	0.599203	3	637.028	1909.07	0.532316
															22035620	High	dAILDALENLTAEELkk	N-Term(iTRAQ4plex); K16(iTRAQ4plex); K17(iTRAQ4plex)	4.22248	1	1	Unique	Used		2.04449	4	580.336	2318.32	1.80042
29540535	SULT1A1	sulfotransferase 1A1 isoform a [Homo sapiens]	3	7	0.711909	7.47873	1.59255	16.8205	34.1432	22.71	16.1678	Cytoplasm	Sulfotransferase activity	Metabolism,Energy pathways
															29540535	High	dVAVSYYHFYHMAk	N-Term(iTRAQ4plex); K14(iTRAQ4plex)	6.6063	1	1	Unique	Used	0.750902	0.51671	3	673.672	2019	-1.20973
															29540535	High	tHPVLYLFYEDMk	N-Term(iTRAQ4plex); K13(iTRAQ4plex)	6.22709	1	1	Not Unique	Not Used	0.878139	0.892772	3	648.678	1944.02	1.10463
															29540535	High	tHLPLALLPQTLLDQk	N-Term(iTRAQ4plex); K16(iTRAQ4plex)	5.63862	1	1	Unique	Used	0.615843	1.08596	3	697.091	2089.26	-1.62305
															29540535	High	tHPVLYLFYEDMk	N-Term(iTRAQ4plex); K13(iTRAQ4plex)	5.05545	1	1	Not Unique	Not Used	0.912321	0.831208	2	972.511	1944.01	-1.80832
															29540535	High	vHPEPGTWDSFLEk	N-Term(iTRAQ4plex); K14(iTRAQ4plex)	4.88531	1	1	Unique	Used	0.65125	0.5061	2	965.497	1929.99	-3.87202
															29540535	High	tHLPLALLPQTLLDQk	N-Term(iTRAQ4plex); K16(iTRAQ4plex)	4.79536	1	1	Unique	Used	0.873818	0.791778	4	523.07	2089.26	-1.07443
															29540535	High	tTFTVAQNER	N-Term(iTRAQ4plex)	4.0071	1	1	Not Unique	Not Used	1.00316	1.19509	2	655.843	1310.68	-3.04126
29540564	ARMCX3	armadillo repeat-containing X-linked protein 3 [Homo sapiens]	1	1	2.049		0.804157		42.4739	5.01	6.42042	Plasma membrane	Molecular function unknown	Embryonic development,Immune response
															29540564	High	mAEGGSGDVDDAGDcSGAR	N-Term(iTRAQ4plex); C15(Methylthio)	6.42042	1	1	Unique	Used	2.049	3.07583	2	980.381	1959.75	-2.78662
															33286446	High	dADAGDEDEESEEPR	N-Term(iTRAQ4plex)	4.7139	1	1	Unique	Used	0.869022	0.606716	2	904.364	1807.72	-0.470844
38016914	SAMHD1	SAM domain and HD domain-containing protein 1 [Homo sapiens]	2	3	1.05357	1.65135	1.49161	14.3919	72.1548	4.47	10.2211	Cytoplasm, Nucleus	GTPase activity	Immune response
															38016914	High	eNEITGALLPcLDESR	N-Term(iTRAQ4plex); C11(Methylthio)	5.51925	1	1	Unique	Used	1.09188	0.640561	2	975.473	1949.94	-2.40278
															38016914	High	eNEITGALLPcLDESR	N-Term(iTRAQ4plex); C11(Methylthio)	5.33527	1	1	Unique	Used	1.04127	0.703343	2	975.47	1949.93	-5.21989
															38016914	High	tWGPEQVcSFLR	N-Term(iTRAQ4plex); C8(Methylthio)	4.70187	1	1	Unique	Used	1.04049	0.536893	2	806.89	1612.77	-0.941972
51477708	HNRNPD	heterogeneous nuclear ribonucleoprotein D0 isoform d [Homo sapiens]	3	3	0.986712	9.05217	1.57237	6.99498	30.6531	10.45	7.52063	Cytoplasm, Nucleus	MRNA binding	Regulation of nucleobase, nucleoside, nucleotide and nucleic acid metabolism
															51477708	High	iFVGGLSPDTPEEk	N-Term(iTRAQ4plex); K14(iTRAQ4plex)	5.03577	1	1	Unique	Used	0.923554	0.60147	2	888.983	1776.96	-2.36465
															51477708	High	gFGFVLFk	N-Term(iTRAQ4plex); K8(iTRAQ4plex)	3.95923	1	1	Unique	Used	1.10543	0.645939	2	601.859	1202.71	-5.82718
															51477708	High	gFcFITFk	N-Term(iTRAQ4plex); C3(Methylthio); K8(iTRAQ4plex)	3.5614	1	1	Unique	Used	0.997106	0.514811	2	648.836	1296.67	-5.20825
52426774	HLA-DRA	HLA class II histocompatibility antigen, DR alpha chain precursor [Homo sapiens]	2	3	0.880843	19.5931	1.53024	20.3158	28.6027	11.42	5.82216	Plasma membrane	MHC class I receptor activity,MHC class II receptor activity	Immune response
															52426774	High	fHYLPFLPSTEDVYDcR	N-Term(iTRAQ4plex); C16(Methylthio)	5.82216	1	1	Unique	Used	0.683217	1.17825	3	764.689	2292.05	-2.66613
															52426774	High	fHYLPFLPSTEDVYDcR	N-Term(iTRAQ4plex); C16(Methylthio)	5.67515	1	1	Unique	Used	0.957443	1.76725	3	764.691	2292.06	-0.109743
															52426774	High	vEHWGLDEPLLk	N-Term(iTRAQ4plex); K12(iTRAQ4plex)	5.26508	1	1	Unique	Used	1.00187	1.64523	2	862.487	1723.97	2.06416
62414289	VIM	vimentin [Homo sapiens]	11	19	1.01864	8.05063	1.73346	17.8716	53.6191	25.32	22.4135	Intermediate filament	Structural constituent of cytoskeleton	Cell growth and/or maintenance
															62414289	High	kVESLQEEIAFLk	K1(iTRAQ4plex); N-Term(iTRAQ4plex); K13(iTRAQ4plex)	7.0066	1	1	Unique	Used	1.02263	1.85274	3	656.055	1966.15	-3.85332
															62414289	High	eMEENFAVEAANYQDTIGR	N-Term(iTRAQ4plex)	6.47025	1	1	Unique	Used	1.08347	2.04352	2	1166.03	2331.06	-4.56173
															62414289	High	eMEENFAVEAANYQDTIGR	N-Term(iTRAQ4plex)	6.2019	1	1	Unique	Used	1.146	2.01002	2	1166.04	2331.06	-2.04811
															62414289	High	kVESLQEEIAFLk	K1(iTRAQ4plex); N-Term(iTRAQ4plex); K13(iTRAQ4plex)	6.12213	1	1	Unique	Used	0.928677	2.17709	2	983.581	1966.15	-1.95286
															62414289	High	eMEENFAVEAANYQDTIGR	N-Term(iTRAQ4plex)	5.75492	1	1	Unique	Used	0.997468	0.700396	3	777.69	2331.06	-5.24827
															62414289	High	iLLAELEQLk	N-Term(iTRAQ4plex); K10(iTRAQ4plex)	5.06796	1	1	Unique	Used	1.09643	1.84153	2	729.462	1457.92	-0.452174
															62414289	High	iLLAELEQLk	N-Term(iTRAQ4plex); K10(iTRAQ4plex)	4.9252	1	1	Unique	Used	0.890687	2.23629	2	729.461	1457.91	-2.71287
															62414289	High	nLQEAEEWYk	N-Term(iTRAQ4plex); K10(iTRAQ4plex)	4.59127	1	1	Unique	Used	1.11939	1.42422	2	799.404	1597.8	-6.24663
															62414289	High	eYQDLLNVk	N-Term(iTRAQ4plex); K9(iTRAQ4plex)	4.56122	1	1	Unique	Used	1.08656	1.75028	2	705.393	1409.78	-7.00507
															62414289	High	eYQDLLNVk	N-Term(iTRAQ4plex); K9(iTRAQ4plex)	4.42485	1	1	Unique	Used	0.897291	1.81461	2	705.393	1409.78	-6.57213
															62414289	High	eEAENTLQSFR	N-Term(iTRAQ4plex)	4.36695	1	1	Unique	Used	0.982198	1.80078	2	734.363	1467.72	-0.750036
															62414289	High	eEAENTLQSFR	N-Term(iTRAQ4plex)	4.30798	1	1	Unique	Used	0.933719	1.80361	2	734.362	1467.72	-2.2471
															62414289	High	iLLAELEQLk	N-Term(iTRAQ4plex); K10(iTRAQ4plex)	4.24174	1	1	Unique	Used	1.10869	1.95485	3	486.646	1457.92	4.35301
															62414289	High	lQDEIQNMk	N-Term(iTRAQ4plex); K9(iTRAQ4plex)	4.20993	1	1	Unique	Used	1.03435	1.71198	2	703.877	1406.75	-5.67075
															62414289	High	lGDLYEEEMR	N-Term(iTRAQ4plex)	3.89046	1	1	Unique	Used	1.08172	2.16448	2	699.837	1398.67	-2.24577
															62414289	High	dNLAEDIMR	N-Term(iTRAQ4plex)	3.85361	1	1	Unique	Used	1.03037	1.40754	2	610.806	1220.6	-1.37187
															62414289	High	qDVDNASLAR	N-Term(iTRAQ4plex)	3.77485	1	1	Unique	Used	0.99803	1.44903	2	616.822	1232.64	0.780196
															62414289	High	iLLAELEQLk	N-Term(iTRAQ4plex); K10(iTRAQ4plex)	3.75379	1	1	Unique	Used	0.91973	2.00428	3	486.644	1457.92	-1.1731
															62414289	High	lQEEMLQR	N-Term(iTRAQ4plex)	2.82677	1	1	Unique	Used	1.04272	1.10678	2	595.819	1190.63	-1.14348
109715858	CARHSP1	calcium-regulated heat stable protein 1 [Homo sapiens]	1	1	1.00201		0.531493		15.882	10.88	6.53258	Cytoplasm	Calcium ion binding	Cell communication,Signal transduction
															109715858	High	lQAVEVVITHLAPGTk	N-Term(iTRAQ4plex); K16(iTRAQ4plex)	6.53258	1	1	Unique	Used	1.00201	0.531493	3	655.396	1964.17	-1.93651
117190254	HNRNPC	heterogeneous nuclear ribonucleoproteins C1/C2 isoform b [Homo sapiens]	1	1	1.11144		1.57365		32.3179	3.41	4.66977	Nucleus	RNA binding	Regulation of nucleobase, nucleoside, nucleotide and nucleic acid metabolism
															117190254	High	vDSLLENLEk	N-Term(iTRAQ4plex); K10(iTRAQ4plex)	4.66977	1	1	Unique	Used	1.11144	1.57365	2	724.411	1447.81	-7.28187
151301219	PRMT1	protein arginine N-methyltransferase 1 isoform 3 [Homo sapiens]	1	2	0.644055	7.59863	1.11335	11.2916	40.522	3.4	3.08446	Nucleus	Methyltransferase activity	Metabolism,Energy pathways
															151301219	High	wLAPDGLIFPDR	N-Term(iTRAQ4plex)	3.08446	1	1	Unique	Used	0.67866	1.20225	2	772.418	1543.83	-6.54171
															151301219	High	wLAPDGLIFPDR	N-Term(iTRAQ4plex)	2.90322	1	1	Unique	Used	0.60945	1.02446	2	772.421	1543.83	-2.66728
153251270	CPPED1	calcineurin-like phosphoesterase domain-containing protein 1 isoform a [Homo sapiens]	3	3	0.839236	8.23455	1.39253	5.282	35.5259	17.2	10.624	0	Molecular function unknown	Biological_process unknown
															153251270	High	aIPLVLVSGNHDIGNTPTAETVEEFcR	N-Term(iTRAQ4plex); C26(Methylthio)	7.579	1	1	Unique	Used	0.799656	1.65935	3	1024.85	3072.53	1.164
															153251270	High	gPFYFILGADPQFGLIk	N-Term(iTRAQ4plex); K17(iTRAQ4plex)	5.17087	1	1	Unique	Used	0.79037	1.44454	3	724.41	2171.21	0.0245744
															153251270	High	yYSLDELSEk	N-Term(iTRAQ4plex); K10(iTRAQ4plex)	3.04504	1	1	Unique	Used	0.986332	1.08295	2	767.894	1534.78	-5.27408
194239729	EEF1D	elongation factor 1-delta isoform 4 [Homo sapiens]	1	3	0.772816		1.59392		28.5404	12.84	7.88036	Endoplasmic reticulum	Guanyl-nucleotide exchange factor activity	Cell communication,Signal transduction
															194239729	High	qSSGPGASSGTSGDHGELVVR	N-Term(iTRAQ4plex)	7.88036	1	1	Unique	Used	0.772816	1.59392	3	710.347	2129.03	-3.58989
															194239729	High	iASLEVENQSLR	N-Term(iTRAQ4plex)	4.00584	1	1	Not Unique	Not Used	1.15174	1.16585	2	751.918	1502.83	-1.0752
															194239729	High	iASLEVENQSLR	N-Term(iTRAQ4plex)	3.75135	1	1	Not Unique	Not Used	1.08195	0.908813	2	751.916	1502.83	-2.69975
209862831	ANXA2	annexin A2 isoform 2 [Homo sapiens]	10	24	0.889893	12.5548	1.66942	22.9403	38.5798	38.64	29.7443	Nucleus	Calcium ion binding	Cell communication,Signal transduction
															209862831	High	gLGTDEDSLIEIIcSR	N-Term(iTRAQ4plex); C14(Methylthio)	6.89015	1	1	Unique	Used	1.02195	1.49663	2	955.969	1910.93	-0.197326
															209862831	High	rAEDGSVIDYELIDQDAR	N-Term(iTRAQ4plex)	5.97163	1	1	Unique	Used	1.04729	0.545319	3	737.031	2209.08	-3.47765
															209862831	High	gVDEVTIVNILTNR	N-Term(iTRAQ4plex)	5.59922	1	1	Unique	Used	1.58548	1.41137	3	562.988	1686.95	-0.697248
															209862831	High	sALSGHLETVILGLLk	N-Term(iTRAQ4plex); K16(iTRAQ4plex)	5.52645	1	1	Unique	Used	0.818721	1.96364	3	647.066	1939.18	0.15288
															209862831	High	gVDEVTIVNILTNR	N-Term(iTRAQ4plex)	5.39483	1	1	Unique	Used	0.756772	1.3443	3	562.985	1686.94	-6.23294
															209862831	High	lSLEGDHSTPPSAYGSVk	N-Term(iTRAQ4plex); K18(iTRAQ4plex)	5.36577	1	1	Unique	Used	0.731931	1.27042	3	711.704	2133.1	-3.75526
															209862831	High	gLGTDEDSLIEIIcSR	N-Term(iTRAQ4plex); C14(Methylthio)	5.31282	1	1	Unique	Used	0.98304	2.69378	3	637.646	1910.92	-4.133
															209862831	High	lSLEGDHSTPPSAYGSVk	N-Term(iTRAQ4plex); K18(iTRAQ4plex)	5.28696	1	1	Unique	Used	0.669494	2.39184	3	711.704	2133.1	-4.44198
															209862831	High	gVDEVTIVNILTNR	N-Term(iTRAQ4plex)	5.28148	1	1	Unique	Used	0.953709	1.59576	2	843.975	1686.94	-5.13954
															209862831	High	gVDEVTIVNILTNR	N-Term(iTRAQ4plex)	5.23609	1	1	Unique	Used	0.897912	1.28199	3	562.986	1686.94	-4.3877
															209862831	High	gVDEVTIVNILTNR	N-Term(iTRAQ4plex)	5.10745	1	1	Unique	Used	0.984566	1.48352	2	843.976	1686.95	-3.18576
															209862831	High	gVDEVTIVNILTNR	N-Term(iTRAQ4plex)	5.06765	1	1	Unique	Used	0.932087	1.6227	2	843.976	1686.94	-3.47521
															209862831	High	sLYYYIQQDTk	N-Term(iTRAQ4plex); K11(iTRAQ4plex)	4.99027	1	1	Unique	Used	0.913559	1.51974	2	855.449	1709.89	-5.28642
															209862831	High	gVDEVTIVNILTNR	N-Term(iTRAQ4plex)	4.98137	1	1	Unique	Used	0.977934	1.60043	2	843.975	1686.94	-4.27119
															209862831	High	sALSGHLETVILGLLk	N-Term(iTRAQ4plex); K16(iTRAQ4plex)	4.91365	1	1	Unique	Used	0.919136	3.5596	4	485.552	1939.18	0.64954
															209862831	High	gVDEVTIVNILTNR	N-Term(iTRAQ4plex)	4.45489	1	1	Unique	Used	0.884419	1.2339	2	843.977	1686.95	-2.46214
															209862831	High	sYSPYDMLESIR	N-Term(iTRAQ4plex)	4.25595	1	1	Unique	Used	0.952441	1.87428	2	802.889	1604.77	-1.90697
															209862831	High	dALNIETAIk	N-Term(iTRAQ4plex); K10(iTRAQ4plex)	4.21196	1	1	Unique	Used	0.869102	1.47057	2	688.401	1375.8	-6.05736
															209862831	High	tDLEkDIISDTSGDFR	N-Term(iTRAQ4plex); K5(iTRAQ4plex)	4.17655	1	1	Unique	Used	1.30534	1.73418	3	700.692	2100.06	-4.64867
															209862831	High	dIISDTSGDFR	N-Term(iTRAQ4plex)	3.89898	1	1	Unique	Used	0.972389	1.66877	2	685.338	1369.67	-2.64878
															209862831	High	gVDEVTIVNILTNR	N-Term(iTRAQ4plex)	3.87295	1	1	Unique	Used	0.928299	1.31432	2	843.976	1686.94	-3.54757
															209862831	High	sYSPYDMLESIR	N-Term(iTRAQ4plex)	3.75862	1	1	Unique	Used	0.775554	1.69469	2	802.89	1604.77	-1.83091
															209862831	High	dIISDTSGDFR	N-Term(iTRAQ4plex)	3.43661	1	1	Unique	Used	0.888525	1.33621	2	685.338	1369.67	-1.66842
															209862831	High	gLGTDEDSLIEIIcSR	N-Term(iTRAQ4plex); C14(Methylthio)	3.3796	1	1	No Quan Values	Not Used			3	637.647	1910.93	-3.17479
223278374	DCLRE1A	DNA cross-link repair 1A protein [Homo sapiens]	1	1	1.67324		1.32382		116.326	1.35	2.73669	Nucleus	DNA repair protein	Regulation of nucleobase, nucleoside, nucleotide and nucleic acid metabolism
															223278374	High	aDPSMERSLLADQk	N-Term(iTRAQ4plex); K14(iTRAQ4plex)	2.73669	1	1	Unique	Used	1.67324	1.32382	2	924.979	1848.95	-12.2915
223555921	VPS37A	vacuolar protein sorting-associated protein 37A isoform 2 [Homo sapiens]	1	1	0.50483		1.13498		41.43	3.49	3.69662	Nucleus	Molecular function unknown	Transport
															223555921	High	mEIDDFLSSFMEk	N-Term(iTRAQ4plex); K13(iTRAQ4plex)	3.69662	1	1	Unique	Used	0.50483	1.13498	3	627.31	1879.91	4.39568
224451038	YIF1B	protein YIF1B isoform 2 [Homo sapiens]	1	1	1.43016		0.673632		31.1542	4.59	3.97239	-	Molecular function unknown	Biological_process unknown
															224451038	High	iLADAAAEGVPVR	N-Term(iTRAQ4plex)	3.97239	1	1	Unique	Used	1.43016	0.673632	2	713.411	1425.81	-2.73223
351721324	SET	protein SET isoform 4 [Homo sapiens]	1	1	0.998728		2.27992		31.1053	5.26	4.43488	Nucleus	MHC class I receptor activity,MHC class II receptor activity	Regulation of nucleobase, nucleoside, nucleotide and nucleic acid metabolism
															351721324	High	iDFYFDENPYFENk	N-Term(iTRAQ4plex); K14(iTRAQ4plex)	4.43488	1	1	Unique	Used	0.998728	2.27992	3	710.34	2129.01	-2.48618
371502127	CAPG	macrophage-capping protein isoform 2 [Homo sapiens]	2	4	0.946608	2.75598	1.71466	31.0584	36.8337	11.41	12.1528	Cytoplasm	Cytoskeletal protein binding	Cell growth and/or maintenance
															371502127	High	mQYAPNTQVEILPQGHESPIFk	N-Term(iTRAQ4plex); K22(iTRAQ4plex)	8.03366	1	1	Unique	Used	0.852586	0.795512	3	939.156	2815.45	-6.04333
															371502127	High	eVQGNESDLFMSYFPR	N-Term(iTRAQ4plex)	6.73421	1	1	Unique	Used	0.921842	2.09536	2	1031.99	2062.96	-0.957541
															371502127	High	eVQGNESDLFMSYFPR	N-Term(iTRAQ4plex)	6.61717	1	1	Unique	Used	0.973843	1.94252	2	1031.98	2062.96	-4.15286
															371502127	High	mQYAPNTQVEILPQGHESPIFk	N-Term(iTRAQ4plex); K22(iTRAQ4plex)	4.11914	1	1	Unique	Used	1.04552	1.53792	4	704.62	2815.46	-3.83688
10863945	XRCC5	X-ray repair cross-complementing protein 5 [Homo sapiens]	2	2	1.17995	13.3076	2.25236	5.21968	82.6523	3.28	4.30388	Nucleus	DNA repair protein	Regulation of nucleobase, nucleoside, nucleotide and nucleic acid metabolism
															10863945	High	lFQcLLHR	N-Term(iTRAQ4plex); C4(Methylthio)	4.30388	1	1	Unique	Used	1.29098	2.33549	3	407.223	1219.65	-1.86413
															10863946	High	hLMLPDFDLLEDIESk	N-Term(iTRAQ4plex); K16(iTRAQ4plex)	4.23703	1	1	Unique	Used	1.06892	2.16923	4	551.543	2203.15	-2.57724
118601081	HNRNPUL2	heterogeneous nuclear ribonucleoprotein U-like protein 2 [Homo sapiens]	1	1	1.04893		1.68716		85.0522	2.95	7.55647	Nucleus	RNA binding	Regulation of nucleobase, nucleoside, nucleotide and nucleic acid metabolism
															118601081	High	eEPFFPPPEEFVFIHAVPVEER	N-Term(iTRAQ4plex)	7.55647	1	1	Unique	Used	1.04893	1.68716	3	929.139	2785.4	0.962337
14141161	HNRNPU	heterogeneous nuclear ribonucleoprotein U isoform b [Homo sapiens]	1	4	1.05426	47.0469	1.86034	16.8618	88.9242	2.73	13.2059	Cytoplasm, Nucleus	RNA binding	Regulation of nucleobase, nucleoside, nucleotide and nucleic acid metabolism
															14141161	High	ekPYFPIPEEYTFIQNVPLEDR	N-Term(iTRAQ4plex); K2(iTRAQ4plex)	7.68537	1	1	Unique	Used	2.02249	2.07527	3	1004.86	3012.57	2.65417
															14141161	High	ekPYFPIPEEYTFIQNVPLEDR	N-Term(iTRAQ4plex); K2(iTRAQ4plex)	7.24333	1	1	Unique	Used	0.746946	1.8387	3	1004.86	3012.57	2.83651
															14141161	High	ekPYFPIPEEYTFIQNVPLEDR	N-Term(iTRAQ4plex); K2(iTRAQ4plex)	5.63475	1	1	Unique	Used	0.662649	2.35784	3	1004.84	3012.51	-17.7077
															14141161	High	ekPYFPIPEEYTFIQNVPLEDR	N-Term(iTRAQ4plex); K2(iTRAQ4plex)	5.52053	1	1	Unique	Used	0.976008	1.29371	4	753.896	3012.56	0.137448
14210536	TUBB6	tubulin beta-6 chain [Homo sapiens]	1	25	0.911652	47.284	0.508461	17.8807	49.825	16.82	46.5241	-	Structural constituent of cytoskeleton	Cell growth and/or maintenance
															14210536	High	mASTFIGNSTAIQELFk	N-Term(iTRAQ4plex); K17(iTRAQ4plex)	6.54849	1	1	Unique	Used	0.606842	0.444174	3	716.055	2146.15	2.10347
															14210536	High	mASTFIGNSTAIQELFk	N-Term(iTRAQ4plex); K17(iTRAQ4plex)	6.30986	1	1	Unique	Used	1.21646	0.572749	3	716.052	2146.14	-1.39457
															14210536	High	lHFFMPGFAPLTSR	N-Term(iTRAQ4plex)	5.60917	1	1	Not Unique	Not Used	0.871539	1.04528	3	588.983	1764.94	-1.2552
															14210536	High	lHFFMPGFAPLTSR	N-Term(iTRAQ4plex)	5.60893	1	1	Not Unique	Not Used	0.755732	0.972991	3	588.986	1764.94	2.89464
															14210536	High	lHFFMPGFAPLTSR	N-Term(iTRAQ4plex)	5.48293	1	1	Not Unique	Not Used	0.744531	1.05973	3	588.984	1764.94	-0.528973
															14210536	High	nSSYFVEWIPNNVk	N-Term(iTRAQ4plex); K14(iTRAQ4plex)	5.36628	1	1	Not Unique	Not Used	1.09285	0.907974	2	993.021	1985.04	-0.907481
															14210536	High	nSSYFVEWIPNNVk	N-Term(iTRAQ4plex); K14(iTRAQ4plex)	5.36383	1	1	Not Unique	Not Used	1.06392	0.974706	2	993.019	1985.03	-3.67478
															14210536	High	lHFFMPGFAPLTSR	N-Term(iTRAQ4plex)	5.32999	1	1	Not Unique	Not Used	1.05422	1.079	3	588.985	1764.94	1.75344
															14210536	High	lHFFmPGFAPLTSR	N-Term(iTRAQ4plex); M5(Oxidation)	5.32677	1	1	Not Unique	Not Used	1.00922	1.17759	3	594.315	1780.93	-1.6102
															14210536	High	lHFFMPGFAPLTSR	N-Term(iTRAQ4plex)	5.27577	1	1	Not Unique	Not Used	0.874835	1.02538	3	588.983	1764.93	-1.87768
															14210536	High	nSSYFVEWIPNNVk	N-Term(iTRAQ4plex); K14(iTRAQ4plex)	5.2293	1	1	Not Unique	Not Used	0.884746	1.08782	2	993.018	1985.03	-3.98226
															14210536	High	nSSYFVEWIPNNVk	N-Term(iTRAQ4plex); K14(iTRAQ4plex)	4.39304	1	1	Not Unique	Not Used	0.732107	0.781669	3	662.348	1985.03	-3.83529
															14210536	High	lHFFMPGFAPLTSR	N-Term(iTRAQ4plex)	4.33774	1	1	Not Unique	Not Used	0.712919	1.21077	3	588.984	1764.94	-0.217735
															14210536	High	lHFFMPGFAPLTSR	N-Term(iTRAQ4plex)	4.20227	1	1	Not Unique	Not Used	0.835731	0.663488	3	588.985	1764.94	0.923472
															14210536	High	lHFFMPGFAPLTSR	N-Term(iTRAQ4plex)	4.14909	1	1	Not Unique	Not Used	0.781213	1.04834	2	882.971	1764.93	-2.14672
															14210536	High	lHFFMPGFAPLTSR	N-Term(iTRAQ4plex)	3.98402	1	1	Not Unique	Not Used	0.87757	1.03027	2	882.971	1764.93	-1.66256
															14210536	High	kLAVNMVPFPR	K1(iTRAQ4plex); N-Term(iTRAQ4plex)	3.97443	1	1	Not Unique	Not Used	1.13952	0.773322	2	780.467	1559.93	-4.27705
															14210536	High	lAVNMVPFPR	N-Term(iTRAQ4plex)	3.81595	1	1	Not Unique	Not Used	1.22309	0.679821	2	644.371	1287.74	-1.09599
															14210536	High	lHFFMPGFAPLTSR	N-Term(iTRAQ4plex)	3.70505	1	1	Not Unique	Not Used	0.999261	0.682624	3	588.995	1764.97	17.9375
															14210536	High	lAVNMVPFPR	N-Term(iTRAQ4plex)	3.44145	1	1	Not Unique	Not Used	1.08006	0.751163	2	644.371	1287.73	-1.85435
															14210536	High	fPGQLNADLR	N-Term(iTRAQ4plex)	3.13241	1	1	Not Unique	Not Used	0.795873	1.0272	2	637.851	1274.7	-1.41215
															14210536	High	fPGQLNADLR	N-Term(iTRAQ4plex)	3.10029	1	1	Not Unique	Not Used	0.812066	1.00597	2	637.852	1274.7	-1.12486
															14210536	High	vAVcDIPPR	N-Term(iTRAQ4plex); C4(Methylthio)	3.04829	1	1	Not Unique	Not Used	0.831532	0.862053	2	580.307	1159.61	-1.48175
															14210536	High	vAVcDIPPR	N-Term(iTRAQ4plex); C4(Methylthio)	3.03058	1	1	Not Unique	Not Used	0.933505	0.808706	2	580.307	1159.61	-1.16594
															14210536	High	vAVcDIPPR	N-Term(iTRAQ4plex); C4(Methylthio)	2.70837	1	1	Not Unique	Not Used	0.895673	0.964621	2	580.307	1159.61	-2.21863
14277700	RPS12	40S ribosomal protein S12 [Homo sapiens]	2	2	1.10467	2.01151	1.39302	4.01184	14.5055	18.18	7.05127	Ribosome	Structural constituent of ribosome	Protein metabolism
															14277700	High	lVEALcAEHQINLIk	N-Term(iTRAQ4plex); C6(Methylthio); K15(iTRAQ4plex)	7.05127	1	1	Unique	Used	1.08896	1.3535	3	676.713	2028.12	0.628223
															14277701	High	lGEWVGLck	N-Term(iTRAQ4plex); C8(Methylthio); K9(iTRAQ4plex)	3.84655	1	1	Unique	Used	1.12039	1.43254	2	669.862	1338.72	1.81567
33356148	FMNL1	formin-like protein 1 [Homo sapiens]	3	4	1.19445	14.618	1.46362	6.90753	45.8072	10.57	8.02153	Cytoplasm	Cell adhesion molecule activity	Cell growth and/or maintenance
															33356148	High	nAVLEHMEELQEQVALLTER	N-Term(iTRAQ4plex)	8.02153	1	1	Unique	Used	1.30383	1.44702	3	832.767	2496.29	-1.25377
															33356149	High	tNHIGWVQEFLNEENR	N-Term(iTRAQ4plex)	3.48109	1	1	Unique	Used	0.938017	1.58627	2	1065.53	2130.04	-2.37069
4505227	MNDA	myeloid cell nuclear differentiation antigen [Homo sapiens]	1	1	1.06752		0.633404		23.084	9.66	6.88754	Nucleus	Transcription factor activity	Regulation of nucleobase, nucleoside, nucleotide and nucleic acid metabolism
															4505227	High	eASSVSDFNQNFEVPNR	N-Term(iTRAQ4plex)	6.88754	1	1	Unique	Used	1.32985	1.45594	2	1042.49	2083.98	-2.19329
															4505227	High	eASSVSDFNQNFEVPNR	N-Term(iTRAQ4plex)	6.68647	1	1	Unique	Used	1.32424	1.59974	2	1042.49	2083.97	-3.24766
															4505227	High	gFELMDDYHFTSIk	N-Term(iTRAQ4plex); K14(iTRAQ4plex)	5.1863	1	1	Unique	Used	0.959094	1.44311	3	664.33	1990.98	-3.33815
															4505227	High	sLLAYDLGLTTk	N-Term(iTRAQ4plex); K12(iTRAQ4plex)	4.73877	1	1	Unique	Used	1.16463	1.35567	2	791.962	1582.92	-7.61967
46409324	SPRYD4	SPRY domain-containing protein 4 [Homo sapiens]	1	1	1.06752		0.633404		23.084	9.66	7.37931	-	Molecular function unknown	Biological_process unknown
															46409324	High	lSLVDVSQVSVVHTLQTDFR	N-Term(iTRAQ4plex)	7.37931	1	1	Unique	Used	1.06752	0.633404	3	796.438	2387.3	-2.9508
5730027	KHDRBS1	KH domain-containing, RNA-binding, signal transduction-associated protein 1 [Homo sapiens]	1	1	1.20038		1.53441		48.1972	4.51	6.53329	Nucleus	RNA binding	Regulation of nucleobase, nucleoside, nucleotide and nucleic acid metabolism
															5730027	High	dSLDPSFTHAMQLLTAEIEk	N-Term(iTRAQ4plex); K20(iTRAQ4plex)	6.53329	1	1	Unique	Used	1.20038	1.53441	3	845.442	2534.31	1.99562
5902090	SLC2A3	solute carrier family 2, facilitated glucose transporter member 3 [Homo sapiens]	6	20	1.44173	29.2089	0.899157	17.2036	53.8893	12.5	28.6633	Plasma membrane	Auxiliary transport protein activity	Transport
															5902090	High	lWGTQDVSQDIQEMk	N-Term(iTRAQ4plex); K15(iTRAQ4plex)	7.05368	1	1	Unique	Used	1.74338	0.715174	2	1033.52	2066.03	-10.191
															5902090	High	lWGTQDVSQDIQEMkDESAR	N-Term(iTRAQ4plex); K15(iTRAQ4plex)	6.76407	1	1	Unique	Used	3.23454	0.59068	4	656.825	2624.28	-2.71223
															5902090	High	lWGTQDVSQDIQEMkDESAR	N-Term(iTRAQ4plex); K15(iTRAQ4plex)	6.09683	1	1	Unique	Used	2.35624	0.777234	3	875.431	2624.28	-2.70711
															5902090	High	lWGTQDVSQDIQEMk	N-Term(iTRAQ4plex); K15(iTRAQ4plex)	5.96523	1	1	Unique	Used	2.10405	0.856769	2	1033.52	2066.04	-4.51889
															5902090	High	lWGTQDVSQDIQEMkDESAR	N-Term(iTRAQ4plex); K15(iTRAQ4plex)	5.94825	1	1	Unique	Used	2.08411	0.736245	2	1312.64	2624.28	-1.72515
															5902090	High	lWGTQDVSQDIQEMk	N-Term(iTRAQ4plex); K15(iTRAQ4plex)	5.45631	1	1	Unique	Used	1.52379	0.73877	3	689.349	2066.03	-6.20931
															5902090	High	lWGTQDVSQDIQEMkDESAR	N-Term(iTRAQ4plex); K15(iTRAQ4plex)	5.38018	1	1	Unique	Used	1.92335	0.987296	3	875.429	2624.27	-5.21897
															5902090	High	lWGTQDVSQDIQEmk	N-Term(iTRAQ4plex); M14(Oxidation); K15(iTRAQ4plex)	5.28098	1	1	Unique	Used	0.771291	0.985578	3	694.679	2082.02	-8.84946
															5902090	High	lWGTQDVSQDIQEMk	N-Term(iTRAQ4plex); K15(iTRAQ4plex)	5.21489	1	1	Unique	Used	0.921696	0.730238	3	689.353	2066.04	-1.42346
															5902090	High	dGVMEMNSIEPAk	N-Term(iTRAQ4plex); K13(iTRAQ4plex)	5.14135	1	1	Unique	Used	0.875722	1.04386	2	854.927	1708.85	-1.05557
															5902090	High	lWGTQDVSQDIQEMkDESAR	N-Term(iTRAQ4plex); K15(iTRAQ4plex)	5.02025	1	1	Unique	Used	1.47287	0.712071	2	1312.64	2624.28	-2.4694
															5902090	High	dGVMEMNSIEPAk	N-Term(iTRAQ4plex); K13(iTRAQ4plex)	4.90706	1	1	Unique	Used	1.0716	1.02187	2	854.923	1708.84	-6.48461
															5902090	High	qVTVLELFR	N-Term(iTRAQ4plex)	3.80299	1	1	Unique	Used	1.29118	0.901654	2	624.875	1248.74	-1.23123
															5902090	High	qVTVLELFR	N-Term(iTRAQ4plex)	3.66112	1	1	Unique	Used	1.37461	1.00917	2	624.874	1248.74	-1.81775
															5902090	High	qVTVLELFR	N-Term(iTRAQ4plex)	3.61412	1	1	Unique	Used	1.36619	1.0629	2	624.874	1248.74	-2.40428
															5902090	High	aFEGQAHGADR	N-Term(iTRAQ4plex)	3.57715	1	1	Unique	Used	1.09461	1.1251	3	434.881	1302.63	-1.20467
															5902090	High	qVTVLELFR	N-Term(iTRAQ4plex)	3.47174	1	1	Unique	Used	1.2522	0.840091	2	624.874	1248.74	-1.72
															5902090	High	sVEMLILGR	N-Term(iTRAQ4plex)	3.39408	1	1	Unique	Used	1.30719	0.908494	2	581.342	1161.68	-0.721833
															5902090	High	sVEMLILGR	N-Term(iTRAQ4plex)	3.23786	1	1	Unique	Used	1.08608	0.991526	2	581.342	1161.68	-1.77265
															5902090	High	qVTVLELFR	N-Term(iTRAQ4plex)	3.15117	1	1	Unique	Used	0.895207	0.999726	2	624.88	1248.75	6.7846
6679189	TMED3	transmembrane emp24 domain-containing protein 3 precursor [Homo sapiens]	1	2	1.59993		0.926357		24.7613	8.76	16.3123	Integral to membrane	Molecular function unknown	Biological_process unknown
															6679189	High	vTALTQMESAcVTIHEALk	N-Term(iTRAQ4plex); C11(Methylthio); K19(iTRAQ4plex)	10.1268	1	1	Unique	Used	1.59993	0.926357	3	793.748	2379.23	-1.15492
															6679189	High	vTALTQMESAcVTIHEALk	N-Term(iTRAQ4plex); C11(Methylthio); K19(iTRAQ4plex)	6.18545	1	1	Unique	Used			4	595.562	2379.23	-1.82756
375477430	CCT4	T-complex protein 1 subunit delta isoform b [Homo sapiens]	1	19	0.621693		0.936364		54.6851	29.47	20.721	Cytoplasm	Chaperone activity	Protein metabolism
															375477430	High	aFADAMEVIPSTLAENAGLNPISTVTELR	N-Term(iTRAQ4plex)	8.06561	1	1	Not Unique	Not Used	1.06373	0.800608	3	1058.89	3174.64	-1.27528
															375477430	High	lGGTIDDcELVEGLVLTQk	N-Term(iTRAQ4plex); C8(Methylthio); K19(iTRAQ4plex)	7.39621	1	1	Not Unique	Not Used	1.3056	1.04151	2	1169.13	2337.24	6.50837
															375477430	High	gIHPTIISESFQk	N-Term(iTRAQ4plex); K13(iTRAQ4plex)	6.00833	1	1	Unique	Used	0.621693	0.936364	3	582.329	1744.97	-5.71375
															375477430	High	aLIAGGGAPEIELALR	N-Term(iTRAQ4plex)	5.40928	1	1	Not Unique	Not Used	1.02712	0.875967	2	847.997	1694.99	-3.16834
															375477430	High	dALSDLALHFLNk	N-Term(iTRAQ4plex); K13(iTRAQ4plex)	4.70943	1	1	Not Unique	Not Used	0.950144	1.00719	3	582.333	1744.98	0.471573
															375477430	High	dALSDLALHFLNk	N-Term(iTRAQ4plex); K13(iTRAQ4plex)	4.5888	1	1	Not Unique	Not Used	1.05339	1.03325	3	582.333	1744.98	-0.158022
															375477430	High	aLIAGGGAPEIELALR	N-Term(iTRAQ4plex)	4.5793	1	1	Not Unique	Not Used	1.17297	0.766009	2	847.997	1694.99	-3.0243
															375477430	High	aLIAGGGAPEIELALR	N-Term(iTRAQ4plex)	4.55498	1	1	Not Unique	Not Used	1.09345	0.855637	2	847.998	1694.99	-2.16008
															375477430	High	vIDPATATSVDLR	N-Term(iTRAQ4plex)	4.48137	1	1	Not Unique	Not Used	0.817199	0.867714	2	751.418	1501.83	-3.27001
															375477430	High	dIEREDIEFIck	N-Term(iTRAQ4plex); C11(Methylthio); K12(iTRAQ4plex)	4.1142	1	1	Not Unique	Not Used	1.21919	0.959357	3	615.309	1843.91	-2.29905
															375477430	High	aYILNLVk	N-Term(iTRAQ4plex); K8(iTRAQ4plex)	4.03889	1	1	Not Unique	Not Used	1.10609	0.960722	2	611.392	1221.78	-2.70246
															375477430	High	iGLIQFcLSAPk	N-Term(iTRAQ4plex); C7(Methylthio); K12(iTRAQ4plex)	3.69862	1	1	Not Unique	Not Used	1.15012	1.00171	3	541.976	1623.91	-4.33028
															375477430	High	vIDPATATSVDLR	N-Term(iTRAQ4plex)	3.6652	1	1	Not Unique	Not Used	0.975378	0.847401	2	751.419	1501.83	-2.94489
															375477430	High	aLIAGGGAPEIELALR	N-Term(iTRAQ4plex)	3.61903	1	1	Not Unique	Not Used	1.02118	1.07969	3	565.667	1694.99	-3.96848
															375477430	High	aYILNLVk	N-Term(iTRAQ4plex); K8(iTRAQ4plex)	3.30776	1	1	Not Unique	Not Used	0.869972	1.12023	2	611.389	1221.77	-7.79802
															375477430	High	vIDPATATSVDLR	N-Term(iTRAQ4plex)	3.24465	1	1	Not Unique	Not Used	0.927686	0.939419	2	751.419	1501.83	-1.88823
															375477430	High	lVIEEAER	N-Term(iTRAQ4plex)	3.07188	1	1	Not Unique	Not Used	0.921445	0.918607	2	551.814	1102.62	-1.2361
															375477430	High	tVTIVVR	N-Term(iTRAQ4plex)	2.85191	1	1	Not Unique	Not Used	0.987264	0.918102	2	466.306	931.605	-0.474548
															375477430	High	lVIEEAER	N-Term(iTRAQ4plex)	2.7395	1	1	Not Unique	Not Used	0.832536	0.904709	2	551.813	1102.62	-2.67532
71773329	ANXA6	annexin A6 isoform 1 [Homo sapiens]	16	22	0.985613	14.2205	1.42661	10.9176	75.8256	29.57	35.6695	Endoplasmic reticulum	Calcium ion binding	Cell communication,Signal transduction
															71773329	High	gSIHDFPGFDPNQDAEALYTAMk	N-Term(iTRAQ4plex); K23(iTRAQ4plex)	9.35803	1	1	Unique	Used	1.2275	1.41135	3	938.123	2812.35	1.54015
															71773329	High	gSIHDFPGFDPNQDAEALYTAMk	N-Term(iTRAQ4plex); K23(iTRAQ4plex)	7.65522	1	1	Unique	Used	0.972236	1.80378	4	703.842	2812.35	-0.569778
															71773329	High	gLGTDEDTIIDIITHR	N-Term(iTRAQ4plex)	6.58315	1	1	Unique	Used	1.09987	1.11697	3	638.341	1913.01	-0.274371
															71773329	High	dLEADIIGDTSGHFQk	N-Term(iTRAQ4plex); K16(iTRAQ4plex)	6.35659	1	1	Unique	Used	0.883349	1.48127	3	678.681	2034.03	-5.14848
															71773329	High	gLGTDEDTIIDIITHR	N-Term(iTRAQ4plex)	6.35606	1	1	Unique	Used	0.769116	2.10093	3	638.34	1913.01	-2.28441
															71773329	High	lILGLMMPPAHYDAk	N-Term(iTRAQ4plex); K15(iTRAQ4plex)	6.27016	1	1	Unique	Used	1.05822	1.71067	3	653.365	1958.08	-2.1602
															71773329	High	tNEQMHQLVAAYk	N-Term(iTRAQ4plex); K13(iTRAQ4plex)	6.06631	1	1	Unique	Used	1.16056	1.58311	2	910.979	1820.95	-2.97963
															71773329	High	gLGTDEDTIIDIITHR	N-Term(iTRAQ4plex)	5.97571	1	1	Unique	Used	0.779314	1.0387	3	638.339	1913	-3.14586
															71773329	High	lILGLMMPPAHYDAk	N-Term(iTRAQ4plex); K15(iTRAQ4plex)	5.80295	1	1	Unique	Used	0.967424	1.38954	2	979.542	1958.08	-4.24179
															71773329	High	sLHQAIEGDTSGDFLk	N-Term(iTRAQ4plex); K16(iTRAQ4plex)	5.77934	1	1	Unique	Used	0.81372	1.20611	2	1003.52	2006.03	-5.03809
															71773329	High	wGTDEAQFIYILGNR	N-Term(iTRAQ4plex)	5.50175	1	1	Unique	Used	1.1814	1.44411	2	963.991	1926.97	-4.75863
															71773329	High	wGTDEAQFIYILGNR	N-Term(iTRAQ4plex)	4.52663	1	1	Unique	Used	0.598714	0.927735	3	642.995	1926.97	-5.81086
															71773329	High	gFGSDkEAILDIITSR	N-Term(iTRAQ4plex); K6(iTRAQ4plex)	4.40171	1	1	Unique	Used	1.31339	1.65465	3	670.708	2010.11	-1.5183
															71773329	High	iLISLATGHR	N-Term(iTRAQ4plex)	4.19896	1	1	Unique	Used	1.02219	1.77124	3	408.921	1224.75	-4.60488
															71773329	High	lVFDEYLk	N-Term(iTRAQ4plex); K8(iTRAQ4plex)	3.93001	1	1	Unique	Used	0.96072	1.33871	2	657.876	1314.75	-7.31892
															71773329	High	lIVGLMRPPAYcDAk	N-Term(iTRAQ4plex); C12(Methylthio); K15(iTRAQ4plex)	3.92227	1	1	Unique	Used	1.44274	1.7882	3	661.027	1981.07	-0.348104
															71773329	High	aLIEILATR	N-Term(iTRAQ4plex)	3.68658	1	1	Unique	Used	0.99365	2.13353	2	572.363	1143.72	-2.00598
															71773329	High	gFGSDkEAILDIITSR	N-Term(iTRAQ4plex); K6(iTRAQ4plex)	3.67242	1	1	Unique	Used	1.20737	1.20722	3	670.707	2010.11	-2.88469
															71773329	High	cLIEILASR	C1(Methylthio); N-Term(iTRAQ4plex)	3.39262	1	1	Unique	Used	1.34005	1.39857	2	604.336	1207.67	-0.626472
															71773329	High	sEIDLLNIR	N-Term(iTRAQ4plex)	3.3295	1	1	Unique	Used	0.899293	1.1645	2	608.854	1216.7	-0.789871
															71773329	High	eAILDIITSR	N-Term(iTRAQ4plex)	3.20643	1	1	Unique	Used	1.09974	1.34187	2	637.874	1274.74	-2.38175
															71773329	High	sELDMLDIR	N-Term(iTRAQ4plex)	3.16046	1	1	Unique	Used	0.969924	1.40476	2	618.323	1235.64	-2.17728
9955963	ABCB6	ATP-binding cassette sub-family B member 6, mitochondrial [Homo sapiens]	1	2	1.37036		0.551436		93.8262	3.44	19.0173	Mitochondrion	Auxiliary transport protein activity	Transport
															9955963	High	vTAGNDEVEAAAQAAGIHDAIMAFPEGYR	N-Term(iTRAQ4plex)	11.728	1	1	Unique	Used	2.27168	0.629923	3	1040.17	3118.5	-1.53108
															9955963	High	vTAGNDEVEAAAQAAGIHDAIMAFPEGYR	N-Term(iTRAQ4plex)	7.28931	1	1	Unique	Used	0.826657	0.482729	4	780.378	3118.49	-3.23816

## Sheet: SET2 (experimental replicate)
Supporting InformationTable 1B- Differentially abundant proteins in monocytes in high BMD versus low BMD condition in premenopausal (115/114) and postmenopausal (117/116) women. The list includes 45 proteins ≥1.5 fold change, along with their peptide information, molecular, biological functions and localizations.
Protein accession	Gene symbol	Protein name	Unique Peptides	# PSMs	Fold change 115/114	115/114 Variability [%]	Fold change 117/116	117/116 Variability [%]	MW [kDa]	Coverage	Score	Localization	Molecular function	Biological process	Protein accession	Confidence	Peptide Sequence	Modifications	XCorr	ΔScore	Rank	Quan Info	Quan Usage	115/114	117/116	Charge	m/z [Da]	MH+ [Da]	ΔM [ppm]
4502101	ANXA1	annexin A1 [Homo sapiens]	12	25	0.903117	11.974	1.61021	22.6656	38.69	47.98	33.5274	Plasma membrane	Calcium ion binding	Cell communication,Signal transduction
															4502101	High	gFGTDEQAIIDcLGSR	N-Term(iTRAQ4plex); C12(Methylthio)	7.18224	1	1	Unique	Used	0.985647	0.943448	2	936.441	1871.88	0.282342
															4502101	High	gFGTDEQAIIDcLGSR	N-Term(iTRAQ4plex); C12(Methylthio)	6.75676	1	1	Unique	Used	0.978748	0.909293	2	936.448	1871.89	7.06443
															4502101	High	gFGTDEQAIIDcLGSR	N-Term(iTRAQ4plex); C12(Methylthio)	6.50877	1	1	Unique	Used	1.05608	0.999206	2	936.445	1871.88	3.93425
															4502101	High	dESTNVDMSLAQR	N-Term(iTRAQ4plex)	5.65641	1	1	Unique	Used	1.14396	0.913294	2	805.384	1609.76	0.0171184
															4502101	High	gFGTDEQAIIDcLGSR	N-Term(iTRAQ4plex); C12(Methylthio)	5.5002	1	1	Unique	Used	1.04106	0.472541	3	624.634	1871.89	6.76379
															4502101	High	sLYHDISGDTSGDYR	N-Term(iTRAQ4plex)	5.2937	1	1	Unique	Used	1.18232	0.97478	3	610.617	1829.84	-2.87733
															4502101	High	dESTNVDMSLAQR	N-Term(iTRAQ4plex)	5.27512	1	1	Unique	Used	1.08173	1.04286	2	805.382	1609.76	-2.25783
															4502101	High	eMSGDLEEGMLAVVk	N-Term(iTRAQ4plex); K15(iTRAQ4plex)	5.19811	1	1	Unique	Used	1.12408	0.945735	2	948.487	1895.97	-1.47194
															4502101	High	dESTNVDMSLAQR	N-Term(iTRAQ4plex)	5.16003	1	1	Unique	Used	0.984831	1.16369	2	805.38	1609.75	-4.68445
															4502101	High	sLYHDISGDTSGDYR	N-Term(iTRAQ4plex)	5.05568	1	1	Unique	Used	1.06713	1.08173	2	915.422	1829.84	-2.76992
															4502101	High	tPVLFDIYEIk	N-Term(iTRAQ4plex); K11(iTRAQ4plex)	5.03342	1	1	Unique	Used	1.09532	0.964293	2	813.478	1625.95	5.59954
															4502101	High	aHLVAVFNEYQR	N-Term(iTRAQ4plex)	4.64027	1	1	Unique	Used	1.00811	0.730947	3	530.952	1590.84	-5.22353
															4502101	High	gFGTDEQAIIDcLGSR	N-Term(iTRAQ4plex); C12(Methylthio)	4.5552	1	1	Unique	Used	0.95448	1.3132	3	624.636	1871.89	9.20924
															4502101	High	dAQELYAAGENR	N-Term(iTRAQ4plex)	4.48141	1	1	Unique	Used	0.947333	0.978207	2	740.859	1480.71	-2.89416
															4502101	High	tPVLFDIYEIk	N-Term(iTRAQ4plex); K11(iTRAQ4plex)	4.35199	1	1	Unique	Used	1.23246	1.01895	2	813.471	1625.93	-3.40966
															4502101	High	gTITDAPGFDPLR	N-Term(iTRAQ4plex)	4.17669	1	1	Unique	Used	0.917136	1.08984	2	752.399	1503.79	-0.593696
															4502101	High	gTITDAPGFDPLR	N-Term(iTRAQ4plex)	4.1606	1	1	Unique	Used	0.934405	1.10156	2	752.399	1503.79	-1.40545
															4502101	High	aHLVAVFNEYQR	N-Term(iTRAQ4plex)	4.0695	1	1	Unique	Used	1.04773	0.834702	2	795.924	1590.84	-6.02078
															4502101	High	gFGTDEQAIIDcLGSR	N-Term(iTRAQ4plex); C12(Methylthio)	4.0681	1	1	Unique	Used	0.833412	1.14024	3	624.633	1871.88	4.90525
															4502101	High	gTITDAPGFDPLR	N-Term(iTRAQ4plex)	4.04028	1	1	Unique	Used	0.979315	1.03844	2	752.4	1503.79	-0.431346
															4502101	High	tPVLFDIYEIk	N-Term(iTRAQ4plex); K11(iTRAQ4plex)	3.9512	1	1	Unique	Used	1.11271	1.04734	3	542.649	1625.93	-5.03209
															4502101	High	dESTNVDmSLAQR	N-Term(iTRAQ4plex); M8(Oxidation)	3.88714	1	1	Unique	Used	0.831324	1.08984	3	542.587	1625.75	-5.46084
															4502101	High	dESTNVDmSLAQR	N-Term(iTRAQ4plex); M8(Oxidation)	3.4282	1	1	Unique	Used	1.07679	1.03621	2	813.378	1625.75	-4.73925
															4502101	High	tPVLFDIYEIk	N-Term(iTRAQ4plex); K11(iTRAQ4plex)	3.3113	1	1	Unique	Used	1.36009	0.858172	3	542.649	1625.93	-3.90593
															4502101	High	qQILLSFk	N-Term(iTRAQ4plex); K8(iTRAQ4plex)	3.28946	1	1	Unique	Used	1.04082	0.959909	2	632.891	1264.77	-9.62509
															4502101	High	sLYHDISGDTSGDYR	N-Term(iTRAQ4plex)	3.21863	1	1	Unique	Used	1.12722	0.850521	2	915.419	1829.83	-6.03878
															4502101	High	dESTNVDmSLAQR	N-Term(iTRAQ4plex); M8(Oxidation)	3.15171	1	1	Unique	Used	0.947622	1.08184	2	813.381	1625.76	-0.234111
															4502101	High	dESTNVDMSLAQR	N-Term(iTRAQ4plex)	3.07807	1	1	Unique	Used	1.24134	0.734407	3	537.259	1609.76	0.5775
															4502101	High	lLISLSQGNR	N-Term(iTRAQ4plex)	2.84723	1	1	Unique	Used	1.23433	0.957567	2	622.875	1244.74	-0.811869
4504321	HIST1H4I	histone H4 [Homo sapiens]	6	23	1.17089	10.6531	1.55252	26.1788	11.3604	51.46	36.3976	Nucleus	DNA binding	Regulation of nucleobase, nucleoside, nucleotide and nucleic acid metabolism
															4504321	High	kTVTAMDVVYALk	N-Term(iTRAQ4plex); K1(iTRAQ4plex); K13(iTRAQ4plex)	6.53186	1	1	Unique	Used	1.31623	1.56611	2	936.053	1871.1	-2.99302
															4504321	High	tVTAMDVVYALk	N-Term(iTRAQ4plex); K12(iTRAQ4plex)	5.77926	1	1	Unique	Used	1.32125	1.41795	2	799.953	1598.9	-4.33517
															4504321	High	tVTAMDVVYALk	N-Term(iTRAQ4plex); K12(iTRAQ4plex)	5.66457	1	1	Unique	Used	1.10153	1.40421	2	799.959	1598.91	2.23061
															4504321	High	tVTAMDVVYALk	N-Term(iTRAQ4plex); K12(iTRAQ4plex)	5.62389	1	1	Unique	Used	1.11481	1.75443	2	799.957	1598.91	-0.441497
															4504321	High	tVTAMDVVYALk	N-Term(iTRAQ4plex); K12(iTRAQ4plex)	5.57218	1	1	Unique	Used	1.12329	1.64305	2	799.955	1598.9	-2.19746
															4504321	High	kTVTAMDVVYALk	N-Term(iTRAQ4plex); K1(iTRAQ4plex); K13(iTRAQ4plex)	5.06121	1	1	Unique	Used	0.960163	1.63683	3	624.373	1871.1	0.490125
															4504321	High	tVTAmDVVYALk	N-Term(iTRAQ4plex); M5(Oxidation); K12(iTRAQ4plex)	4.66691	1	1	Unique	Used	0.941384	1.58735	2	807.952	1614.9	-3.41112
															4504321	High	kTVTAMDVVYALk	N-Term(iTRAQ4plex); K1(iTRAQ4plex); K13(iTRAQ4plex)	4.50712	1	1	Unique	Used	1.26107	0.870974	3	624.366	1871.08	-11.1553
															4504321	High	iSGLIYEETR	N-Term(iTRAQ4plex)	3.97305	1	1	Unique	Used	1.2878	1.78608	2	662.863	1324.72	-3.67559
															4504321	High	dAVTYTEHAk	N-Term(iTRAQ4plex); K10(iTRAQ4plex)	3.95229	1	1	Unique	Used	1.65712	1.20821	2	711.875	1422.74	-2.13486
															4504321	High	iSGLIYEETR	N-Term(iTRAQ4plex)	3.87903	1	1	Unique	Used	1.12086	1.87275	2	662.865	1324.72	-0.542553
															4504321	High	dAVTYTEHAk	N-Term(iTRAQ4plex); K10(iTRAQ4plex)	3.87882	1	1	Unique	Used	1.84884	1.29254	3	474.92	1422.75	-1.00747
															4504321	High	dNIQGITkPAIR	N-Term(iTRAQ4plex); K8(iTRAQ4plex)	3.74422	1	1	Unique	Used	1.04326	1.81819	3	538.655	1613.95	-5.38896
															4504321	High	iSGLIYEETR	N-Term(iTRAQ4plex)	3.72072	1	1	Unique	Used	1.11393	1.68559	2	662.864	1324.72	-2.20122
															4504321	High	tVTAMDVVYALk	N-Term(iTRAQ4plex); K12(iTRAQ4plex)	3.58198	1	1	Unique	Used	1.20576	3.00052	3	533.639	1598.9	-2.77847
															4504321	High	iSGLIYEETR	N-Term(iTRAQ4plex)	3.55299	1	1	Unique	Used	1.1402	1.73235	2	662.859	1324.71	-9.29668
															4504321	High	iSGLIYEETR	N-Term(iTRAQ4plex)	3.36828	1	1	Unique	Used	1.06793	1.50894	2	662.862	1324.72	-4.04419
															4504321	High	iSGLIYEETR	N-Term(iTRAQ4plex)	3.28215	1	1	Unique	Used	1.0207	1.69634	2	662.869	1324.73	5.53917
															4504321	High	vFLENVIR	N-Term(iTRAQ4plex)	3.2463	1	1	Unique	Used	0.851389	1.57767	2	567.345	1133.68	2.82157
															4504321	High	vFLENVIR	N-Term(iTRAQ4plex)	3.18493	1	1	Unique	Used	0.985738	2.03629	2	567.344	1133.68	0.345027
															4504321	High	vFLENVIR	N-Term(iTRAQ4plex)	3.14041	1	1	Unique	Used	1.12706	1.85989	2	567.341	1133.68	-3.85436
															4504321	High	tVTAMDVVYALk	N-Term(iTRAQ4plex); K12(iTRAQ4plex)	2.99346	1	1	Unique	Used	0.823026	2.35575	2	799.957	1598.91	0.169272
															4504321	High	vFLENVIR	N-Term(iTRAQ4plex)	2.85928	1	1	Unique	Used	0.906988	2.04509	2	567.346	1133.69	4.8674
4504517	HSPB1	heat shock protein beta-1 [Homo sapiens]	5	12	0.688346	19.3102	0.776667	12.9431	22.7685	32.2	27.1944	Cytoplasm	Chaperone activity	Protein metabolism
															4504517	High	kYTLPPGVDPTQVSSSLSPEGTLTVEAPMPk	N-Term(iTRAQ4plex); K1(iTRAQ4plex); K31(iTRAQ4plex)	8.50876	1	1	Unique	Used	0.480338	0.458561	3	1220.33	3658.97	3.57264
															4504517	High	kYTLPPGVDPTQVSSSLSPEGTLTVEAPMPk	N-Term(iTRAQ4plex); K1(iTRAQ4plex); K31(iTRAQ4plex)	7.29407	1	1	Unique	Used	0.535801	1.01148	3	1220.33	3658.96	0.169726
															4504517	High	kYTLPPGVDPTQVSSSLSPEGTLTVEAPMPk	N-Term(iTRAQ4plex); K1(iTRAQ4plex); K31(iTRAQ4plex)	6.96628	1	1	Unique	Used	1.01246	1.19005	4	915.497	3658.97	1.15023
															4504517	High	vSLDVNHFAPDELTVk	N-Term(iTRAQ4plex); K16(iTRAQ4plex)	6.33672	1	1	Unique	Used	0.840915	0.776543	3	691.379	2072.12	-2.18703
															4504517	High	vSLDVNHFAPDELTVk	N-Term(iTRAQ4plex); K16(iTRAQ4plex)	5.6169	1	1	Unique	Used	0.67501	0.815269	2	1036.57	2072.12	-1.1496
															4504517	High	vSLDVNHFAPDELTVk	N-Term(iTRAQ4plex); K16(iTRAQ4plex)	4.42524	1	1	Unique	Used	0.448708	0.60905	3	691.381	2072.13	0.552316
															4504517	High	yTLPPGVDPTQVSSSLSPEGTLTVEAPMPk	N-Term(iTRAQ4plex); K30(iTRAQ4plex)	3.87406	1	1	Unique	Used	0.71109	0.785321	3	1129.59	3386.77	0.22281
															4504517	High	dGVVEITGk	N-Term(iTRAQ4plex); K9(iTRAQ4plex)	3.74365	1	1	Unique	Used	0.607492	0.867606	2	603.346	1205.68	-11.316
															4504517	High	lFDQAFGLPR	N-Term(iTRAQ4plex)	3.69163	1	1	Unique	Used	0.590342	0.633056	2	654.365	1307.72	-0.425673
															4504517	High	dGVVEITGk	N-Term(iTRAQ4plex); K9(iTRAQ4plex)	3.68609	1	1	Unique	Used	0.706649	0.86534	2	603.352	1205.7	-0.583958
															4504517	High	dGVVEITGk	N-Term(iTRAQ4plex); K9(iTRAQ4plex)	3.19334	1	1	Unique	Used	0.928222	0.910687	2	603.35	1205.69	-3.62131
															4504517	High	lFDQAFGLPR	N-Term(iTRAQ4plex)	3.16185	1	1	Unique	Used	0.672851	0.660574	2	654.362	1307.72	-5.18633
4506549	RNASE2	non-secretory ribonuclease precursor [Homo sapiens]	2	3	0.878408	26.5614	1.58398	44.1983	18.3421	19.88	9.79147	Extracellular	Ribonuclease activity	Regulation of nucleobase, nucleoside, nucleotide and nucleic acid metabolism
															4506549	High	rDPPQYPVVPVHLDR	N-Term(iTRAQ4plex)	5.41754	1	1	Unique	Used	0.713428	1.08894	3	644.688	1932.05	-3.68535
															4506549	High	yAQTPANMFYIVAcDNR	N-Term(iTRAQ4plex); C14(Methylthio)	5.07878	1	1	Unique	Used	1.08478	2.28581	3	723.004	2167	3.9361
															4506549	High	yAQTPANMFYIVAcDNR	N-Term(iTRAQ4plex); C14(Methylthio)	4.71269	1	1	Unique	Used	1.00358	1.89093	2	1084	2167	4.67461
4506715	RPS28	40S ribosomal protein S28 [Homo sapiens]	1	1	1.48353		1.43398		7.8362	17.39	3.63953	Ribosome	Structural constituent of ribosome	Protein metabolism
															4506715	High	eGDVLTLLESER	N-Term(iTRAQ4plex)	3.63953	1	1	Unique	Used	1.48353	1.43398	2	752.903	1504.8	0.858204
4557894	LYZ	lysozyme C precursor [Homo sapiens]	4	8	1.27558	8.26512	1.78726	16.9407	16.5263	40.54	21.4085	Extracellular	Hydrolase activity	Metabolism,Energy pathways
															4557894	High	tPGAVNAcHLScSALLQDNIADAVAcAk	N-Term(iTRAQ4plex); C8(Methylthio); C12(Methylthio); C26(Methylthio); K28(iTRAQ4plex)	10.7594	1	1	Unique	Used	1.33851	1.69559	3	1061.5	3182.47	-3.75914
															4557894	High	tPGAVNAcHLScSALLQDNIADAVAcAk	N-Term(iTRAQ4plex); C8(Methylthio); C12(Methylthio); C26(Methylthio); K28(iTRAQ4plex)	10.649	1	1	Unique	Used	1.4147	1.66989	3	1061.51	3182.52	12.2356
															4557894	High	tPGAVNAcHLScSALLQDNIADAVAcAk	N-Term(iTRAQ4plex); C8(Methylthio); C12(Methylthio); C26(Methylthio); K28(iTRAQ4plex)	6.02561	1	1	Unique	Used	1.47939	1.44858	3	1061.5	3182.49	1.30399
															4557894	High	tPGAVNAcHLScSALLQDNIADAVAcAk	N-Term(iTRAQ4plex); C8(Methylthio); C12(Methylthio); C26(Methylthio); K28(iTRAQ4plex)	5.59654	1	1	Unique	Used	0.954745	1.26073	3	1061.5	3182.48	0.0382111
															4557894	High	sTDYGIFQINSR	N-Term(iTRAQ4plex)	4.61142	1	1	Unique	Used	1.29171	1.9212	2	772.891	1544.78	-4.69851
															4557894	High	sTDYGIFQINSR	N-Term(iTRAQ4plex)	4.49654	1	1	Unique	Used	1.14665	1.80994	2	772.895	1544.78	-0.115271
															4557894	High	gISLANWMcLAk	N-Term(iTRAQ4plex); C9(Methylthio); K12(iTRAQ4plex)	4.05452	1	1	Unique	Used	1.58615	2.29453	3	547.623	1640.85	-2.0878
															4557894	High	wESGYNTR	N-Term(iTRAQ4plex)	3.09731	1	1	Unique	Used	1.19198	2.05428	2	578.781	1156.55	3.13723
4758146	DEFA1	neutrophil defensin 1 preproprotein [Homo sapiens]	1	1	0.31162		1.55247		10.1942	9.57	3.24187	Cytoplasm	Defense/immunity protein activity	Immune response
															4758146	High	yGTcIYQGR	N-Term(iTRAQ4plex); C4(Methylthio)	3.24187	1	1	Unique	Used	0.31162	1.55247	2	625.791	1250.57	-3.15468
4885381	HIST1H1B	histone H1.5 [Homo sapiens]	1	2	0.888738		1.74091		22.5665	8.85	4.71503	Nucleus	DNA binding	Regulation of nucleobase, nucleoside, nucleotide and nucleic acid metabolism
															4885381	High	kQSLGELIGTLNAAk	N-Term(iTRAQ4plex); K1(iTRAQ4plex); K15(iTRAQ4plex)	6.87555	1	1	Unique	Used	0.967412	1.35447	3	659.068	1975.19	-1.4797
															4885381	High	vAHALAEGLGVIAcIGEk	N-Term(iTRAQ4plex); C14(Methylthio); K18(iTRAQ4plex)	6.68462	1	1	Unique	Used	1.04524	1.23374	3	695.717	2085.14	-2.93351
															4885381	High	vAHALAEGLGVIAcIGEk	N-Term(iTRAQ4plex); C14(Methylthio); K18(iTRAQ4plex)	6.67229	1	1	Unique	Used	0.948863	1.12244	2	1043.08	2085.16	6.26414
															4885381	High	eLASQPDVDGFLVGGASLkPEFVDIINAk	N-Term(iTRAQ4plex); K19(iTRAQ4plex); K29(iTRAQ4plex)	6.59742	1	1	Unique	Used	0.678762	0.959153	3	1154.65	3461.92	9.10513
															4885381	High	eLASQPDVDGFLVGGASLkPEFVDIINAk	N-Term(iTRAQ4plex); K19(iTRAQ4plex); K29(iTRAQ4plex)	6.48294	1	1	Unique	Used	0.975626	1.4137	3	1154.64	3461.91	5.93168
															4885381	High	qSLGELIGTLNAAk	N-Term(iTRAQ4plex); K14(iTRAQ4plex)	6.4318	1	1	Unique	Used	0.920946	1.09377	2	851.994	1702.98	-8.11696
															4885381	High	eLASQPDVDGFLVGGASLkPEFVDIINAk	N-Term(iTRAQ4plex); K19(iTRAQ4plex); K29(iTRAQ4plex)	6.10188	1	1	Unique	Used	0.746789	0.769566	4	866.23	3461.9	2.31355
															4885381	High	eLASQPDVDGFLVGGASLkPEFVDIINAk	N-Term(iTRAQ4plex); K19(iTRAQ4plex); K29(iTRAQ4plex)	6.00185	1	1	Unique	Used	0.690374	0.880026	3	1154.63	3461.89	-0.309519
															4885381	High	vPADTEVVcAPPTAYIDFAR	N-Term(iTRAQ4plex); C9(Methylthio)	5.88389	1	1	Unique	Used	0.741221	1.26915	2	1163.08	2325.15	5.70767
															4885381	High	vPADTEVVcAPPTAYIDFAR	N-Term(iTRAQ4plex); C9(Methylthio)	5.68499	1	1	Unique	Used	0.937177	1.07251	2	1163.07	2325.14	-0.487323
															4885381	High	dcGATWVVLGHSER	N-Term(iTRAQ4plex); C2(Methylthio)	5.67449	1	1	Unique	Used	0.768201	1.20399	2	860.404	1719.8	-3.8755
															4885381	High	hVFGESDELIGQk	N-Term(iTRAQ4plex); K13(iTRAQ4plex)	5.548	1	1	Unique	Used	0.720789	1.78551	2	873.961	1746.92	-6.4093
															4885381	High	tATPQQAQEVHEk	N-Term(iTRAQ4plex); K13(iTRAQ4plex)	5.41496	1	1	Unique	Used	0.709134	1.06208	3	585.658	1754.96	18.1939
															4885381	High	vPADTEVVcAPPTAYIDFAR	N-Term(iTRAQ4plex); C9(Methylthio)	5.38908	1	1	Unique	Used	0.920913	1.1106	2	1163.08	2325.15	5.18268
															4885381	High	vPADTEVVcAPPTAYIDFAR	N-Term(iTRAQ4plex); C9(Methylthio)	5.36522	1	1	Unique	Used	1.05079	1.03749	2	1163.08	2325.15	3.60768
															4885381	High	vPADTEVVcAPPTAYIDFAR	N-Term(iTRAQ4plex); C9(Methylthio)	5.3371	1	1	Unique	Used	0.872717	1.22069	2	1163.08	2325.15	4.86768
															4885381	High	vPADTEVVcAPPTAYIDFAR	N-Term(iTRAQ4plex); C9(Methylthio)	5.31953	1	1	Unique	Used	0.787983	1.14626	2	1163.07	2325.14	1.92769
															4885381	High	dcGATWVVLGHSER	N-Term(iTRAQ4plex); C2(Methylthio)	5.29905	1	1	Unique	Used	0.446129	1.32583	3	573.939	1719.8	-2.25079
															4885381	High	vPADTEVVcAPPTAYIDFAR	N-Term(iTRAQ4plex); C9(Methylthio)	5.12291	1	1	Unique	Used	1.02819	0.93983	3	775.717	2325.14	0.0843972
															4885381	High	eLASQPDVDGFLVGGASLkPEFVDIINAk	N-Term(iTRAQ4plex); K19(iTRAQ4plex); K29(iTRAQ4plex)	5.11417	1	1	Unique	Used	0.882317	0.866103	3	1154.63	3461.88	-2.21363
															4885381	High	vVLAYEPVWAIGTGk	N-Term(iTRAQ4plex); K15(iTRAQ4plex)	5.06926	1	1	Unique	Used	1.02822	1.15467	2	946.046	1891.09	-4.01273
															4885381	High	kFFVGGNWk	N-Term(iTRAQ4plex); K1(iTRAQ4plex); K9(iTRAQ4plex)	5.06162	1	1	Unique	Used	0.927848	0.990496	3	505.629	1514.87	-7.30399
															4885381	High	vVLAYEPVWAIGTGk	N-Term(iTRAQ4plex); K15(iTRAQ4plex)	5.04238	1	1	Unique	Used	0.992831	1.09136	2	946.051	1891.09	0.376697
															4885381	High	vPADTEVVcAPPTAYIDFAR	N-Term(iTRAQ4plex); C9(Methylthio)	5.04025	1	1	No Quan Values	Not Used			3	775.721	2325.15	4.57315
															4885381	High	iIYGGSVTGATck	N-Term(iTRAQ4plex); C12(Methylthio); K13(iTRAQ4plex)	4.89455	1	1	Unique	Used	1.00748	1.1178	2	802.416	1603.83	-10.9285
															4885381	High	vPADTEVVcAPPTAYIDFAR	N-Term(iTRAQ4plex); C9(Methylthio)	4.88809	1	1	Unique	Used			3	775.719	2325.14	1.8169
															4885381	High	tATPQQAQEVHEk	N-Term(iTRAQ4plex); K13(iTRAQ4plex)	4.82969	1	1	Unique	Used	0.600241	1.33226	3	585.647	1754.93	-0.58662
															4885381	High	tATPQQAQEVHEk	N-Term(iTRAQ4plex); K13(iTRAQ4plex)	4.76614	1	1	Unique	Used	0.721387	1.09509	3	585.647	1754.93	-0.482282
															4885381	High	vVLAYEPVWAIGTGk	N-Term(iTRAQ4plex); K15(iTRAQ4plex)	4.64752	1	1	Unique	Used	1.17336	1.09629	3	631.033	1891.09	-3.92301
															4885381	High	eLASQPDVDGFLVGGASLkPEFVDIINAk	N-Term(iTRAQ4plex); K19(iTRAQ4plex); K29(iTRAQ4plex)	4.6119	1	1	Unique	Used	0.391785	1.41896	3	1154.64	3461.9	2.54663
															4885381	High	qSLGELIGTLNAAk	N-Term(iTRAQ4plex); K14(iTRAQ4plex)	4.56377	1	1	Unique	Used	1.03817	1.11112	3	568.331	1702.98	-8.41158
															4885381	High	iAVAAQNcYk	N-Term(iTRAQ4plex); C8(Methylthio); K10(iTRAQ4plex)	4.32231	1	1	Unique	Used	0.928899	1.11115	2	707.874	1414.74	-1.5878
															4885381	High	sNVSDAVAQSTR	N-Term(iTRAQ4plex)	4.23453	1	1	Unique	Used	0.821539	1.18684	2	689.855	1378.7	-1.46238
															4885381	High	iIYGGSVTGATck	N-Term(iTRAQ4plex); C12(Methylthio); K13(iTRAQ4plex)	4.1694	1	1	Unique	Used	0.970214	0.979755	2	802.417	1603.83	-10.3957
															4885381	High	sNVSDAVAQSTR	N-Term(iTRAQ4plex)	4.16317	1	1	Unique	Used	0.942885	1.18895	2	689.857	1378.71	1.37089
															4885381	High	sNVSDAVAQSTR	N-Term(iTRAQ4plex)	4.13322	1	1	Unique	Used	0.970144	1.24327	3	460.24	1378.71	1.7817
															4885381	High	kFFVGGNWk	N-Term(iTRAQ4plex); K1(iTRAQ4plex); K9(iTRAQ4plex)	4.11036	1	1	Unique	Used	0.925327	1.11581	2	757.941	1514.87	-6.99293
															4885381	High	kQSLGELIGTLNAAk	N-Term(iTRAQ4plex); K1(iTRAQ4plex); K15(iTRAQ4plex)	3.76586	1	1	Unique	Used	0.563193	0.664044	4	494.552	1975.19	-2.56805
															4885381	High	tATPQQAQEVHEk	N-Term(iTRAQ4plex); K13(iTRAQ4plex)	3.68673	1	1	Unique	Used	1.13958	0.684802	3	585.648	1754.93	1.08279
															4885381	High	vPADTEVVcAPPTAYIDFAR	N-Term(iTRAQ4plex); C9(Methylthio)	3.17068	1	1	Unique	Used	0.672783	1.11029	2	1163.07	2325.14	-0.592323
															4885381	High	sNVSDAVAQSTR	N-Term(iTRAQ4plex)	3.13971	1	1	Unique	Used	0.722273	1.27972	3	460.24	1378.7	-0.210442
															4885381	High	vPADTEVVcAPPTAYIDFAR	N-Term(iTRAQ4plex); C9(Methylthio)	3.06939	1	1	Unique	Used	1.52179	2.00866	3	775.719	2325.14	2.1319
															4885381	High	vIADNVk	N-Term(iTRAQ4plex); K7(iTRAQ4plex)	3.01263	1	1	Unique	Used	0.825518	1.22255	2	523.824	1046.64	-3.98867
															4885381	High	fFVGGNWk	N-Term(iTRAQ4plex); K8(iTRAQ4plex)	2.94929	1	1	Unique	Used	0.990319	1.12143	2	621.849	1242.69	3.3706
5803048	KDELR1	ER lumen protein retaining receptor 1 [Homo sapiens]	1	1	0.730022		0.373293		24.526	8.96	5.47264	Endoplasmic reticulum	Protein binding,Molecular function unknown	Transport,Protein transport
															5803048	High	tGEAETITSHYLFALGVYR	N-Term(iTRAQ4plex)	5.47264	1	1	Unique	Used	0.730022	0.373293	3	758.071	2272.2	10.984
9845511	RAC1	ras-related C3 botulinum toxin substrate 1 isoform Rac1 [Homo sapiens]	3	14	1.70403	36.8291	0.681958	20.4023	21.4362	30.21	17.1948	Cytoplasm	GTPase activity	Cell communication,Signal transduction
															9845511	High	kLTPITYPQGLAMAk	N-Term(iTRAQ4plex); K1(iTRAQ4plex); K15(iTRAQ4plex)	6.16231	1	1	Unique	Used	2.40959	0.666697	2	1032.61	2064.21	-5.93547
															9845511	High	kLTPITYPQGLAMAk	N-Term(iTRAQ4plex); K1(iTRAQ4plex); K15(iTRAQ4plex)	6.1493	1	1	Unique	Used	1.58401	0.598517	3	688.743	2064.21	-5.23234
															9845511	High	lTPITYPQGLAMAk	N-Term(iTRAQ4plex); K14(iTRAQ4plex)	4.88438	1	1	Unique	Used	2.16837	0.574944	2	896.513	1792.02	-5.05951
															9845511	High	hHcPNTPIILVGTk	N-Term(iTRAQ4plex); C3(Methylthio); K14(iTRAQ4plex)	4.6574	1	1	Unique	Used	0.899055	0.804993	3	622.016	1864.03	7.80048
															9845511	High	hHcPNTPIILVGTk	N-Term(iTRAQ4plex); C3(Methylthio); K14(iTRAQ4plex)	4.58483	1	1	Unique	Used	1.09024	0.958653	3	622	1863.98	-17.6418
															9845511	High	cVVVGDGAVGk	N-Term(iTRAQ4plex); C1(Methylthio); K11(iTRAQ4plex)	4.103	1	1	Not Unique	Not Used	1.15656	0.929949	2	669.355	1337.7	-10.0516
															9845511	High	hHcPNTPIILVGTk	N-Term(iTRAQ4plex); C3(Methylthio); K14(iTRAQ4plex)	4.00739	1	1	Unique	Used	1.10811	0.874947	2	932.496	1863.98	-17.6673
															9845511	High	hHcPNTPIILVGTk	N-Term(iTRAQ4plex); C3(Methylthio); K14(iTRAQ4plex)	3.94513	1	1	Unique	Used	0.886881	0.785735	3	622.012	1864.02	2.79072
															9845511	High	cVVVGDGAVGk	N-Term(iTRAQ4plex); C1(Methylthio); K11(iTRAQ4plex)	3.71344	1	1	Not Unique	Not Used	0.954901	0.936752	2	669.352	1337.7	-14.9794
															9845511	High	cVVVGDGAVGk	N-Term(iTRAQ4plex); C1(Methylthio); K11(iTRAQ4plex)	3.57894	1	1	Not Unique	Not Used	0.760077	0.988337	2	669.36	1337.71	-2.47753
															9845511	High	yLEcSALTQR	N-Term(iTRAQ4plex); C4(Methylthio)	3.37944	1	1	Not Unique	Not Used	1.70907	0.735624	2	687.337	1373.67	-0.621545
															9845511	High	tVFDEAIR	N-Term(iTRAQ4plex)	3.27115	1	1	Not Unique	Not Used	0.981196	0.973101	2	547.801	1094.6	-0.822027
															9845511	High	yLEcSALTQR	N-Term(iTRAQ4plex); C4(Methylthio)	3.2499	1	1	Not Unique	Not Used	1.5509	0.683012	2	687.336	1373.66	-1.77679
															9845511	High	tVFDEAIR	N-Term(iTRAQ4plex)	3.19605	1	1	Not Unique	Not Used	1.11809	1.02939	2	547.799	1094.59	-4.61376
10800138	HIST1H2BD	histone H2B type 1-D [Homo sapiens]	2	24	0.998758	9.27157	2.07395	0.155697	13.9276	28.57	39.2066	Nucleus	DNA binding	Chromosome organization and biogenesis (sensu Eukarya)
															10800138	High	aMGIMNSFVNDIFER	N-Term(iTRAQ4plex)	6.42386	1	1	Not Unique	Not Used	1.25117	2.79279	2	944.46	1887.91	-4.47205
															10800138	High	aMGIMNSFVNDIFER	N-Term(iTRAQ4plex)	6.41658	1	1	Not Unique	Not Used	1.23533	2.65652	2	944.47	1887.93	6.39057
															10800138	High	aMGIMNSFVNDIFER	N-Term(iTRAQ4plex)	6.2498	1	1	Not Unique	Not Used	1.11834	2.49081	2	944.467	1887.93	2.9637
															10800138	High	aMGIMNSFVNDIFER	N-Term(iTRAQ4plex)	6.18209	1	1	Not Unique	Not Used	1.17103	2.5053	2	944.473	1887.94	9.17085
															10800138	High	aMGIMNSFVNDIFER	N-Term(iTRAQ4plex)	6.08211	1	1	Not Unique	Not Used	1.08043	2.6191	3	629.983	1887.93	6.64208
															10800138	High	aMGIMNSFVNDIFER	N-Term(iTRAQ4plex)	6.0127	1	1	Not Unique	Not Used	1.04783	2.79693	2	944.472	1887.94	8.20099
															10800138	High	aMGIMNSFVNDIFER	N-Term(iTRAQ4plex)	5.75721	1	1	Not Unique	Not Used	0.996075	2.20137	2	944.465	1887.92	0.506684
															10800138	High	aMGIMNSFVNDIFER	N-Term(iTRAQ4plex)	5.66016	1	1	Not Unique	Not Used	1.03595	1.59432	2	944.471	1887.93	6.51989
															10800138	High	aMGIMNSFVNDIFER	N-Term(iTRAQ4plex)	5.65297	1	1	Not Unique	Not Used	1.0204		3	629.986	1887.94	11.1034
															10800138	High	amGIMNSFVNDIFER	N-Term(iTRAQ4plex); M2(Oxidation)	5.58845	1	1	Not Unique	Not Used	1.07562	2.56175	2	952.468	1903.93	6.18662
															10800138	High	aMGIMNSFVNDIFER	N-Term(iTRAQ4plex)	5.58153	1	1	Not Unique	Not Used	1.51625	3.02778	3	629.98	1887.93	2.37465
															10800138	High	aMGIMNSFVNDIFER	N-Term(iTRAQ4plex)	5.51011	1	1	Not Unique	Not Used	1.07477		3	629.979	1887.92	0.725866
															10800138	High	amGIMNSFVNDIFER	N-Term(iTRAQ4plex); M2(Oxidation)	5.51005	1	1	Not Unique	Not Used	0.955187	1.72421	2	952.464	1903.92	2.66031
															10800138	High	amGIMNSFVNDIFER	N-Term(iTRAQ4plex); M2(Oxidation)	5.38156	1	1	Not Unique	Not Used	1.18908	1.75645	2	952.46	1903.91	-1.956
															10800138	High	aMGImNSFVNDIFER	N-Term(iTRAQ4plex); M5(Oxidation)	5.28147	1	1	Not Unique	Not Used	0.656191	1.25258	3	635.313	1903.92	3.64703
															10800138	High	aMGImNSFVNDIFER	N-Term(iTRAQ4plex); M5(Oxidation)	4.97884	1	1	Not Unique	Not Used	0.999109	2.2884	2	952.465	1903.92	2.91677
															10800138	High	aMGIMNSFVNDIFER	N-Term(iTRAQ4plex)	4.51751	1	1	Not Unique	Not Used	1.00887		3	629.979	1887.92	0.434903
															10800138	High	kESYSVYVYk	N-Term(iTRAQ4plex); K1(iTRAQ4plex); K10(iTRAQ4plex)	4.2365	1	1	Unique	Used	0.751136	1.37716	3	566.649	1697.93	-7.98515
															10800138	High	eSYSVYVYk	N-Term(iTRAQ4plex); K9(iTRAQ4plex)	4.23512	1	1	Unique	Used	1.06424	2.07623	2	713.377	1425.75	-1.95764
															10800138	High	aMGIMNSFVNDIFER	N-Term(iTRAQ4plex)	4.20552	1	1	Not Unique	Not Used	1.09912	1.06334	3	629.976	1887.91	-4.5115
															10800138	High	kESYSVYVYk	N-Term(iTRAQ4plex); K1(iTRAQ4plex); K10(iTRAQ4plex)	3.93074	1	1	Unique	Used	1.15959	3.11639	2	849.474	1697.94	-3.8074
															10800138	High	qVHPDTGISSk	N-Term(iTRAQ4plex); K11(iTRAQ4plex)	3.90253	1	1	Not Unique	Not Used	0.839144	1.31394	3	486.272	1456.8	2.04713
															10800138	High	aMGIMNSFVNDIFER	N-Term(iTRAQ4plex)	3.73985	1	1	Not Unique	Not Used	1.02665	1.32655	2	944.471	1887.93	7.10181
															10800138	High	aMGIMNSFVNDIFER	N-Term(iTRAQ4plex)	3.28588	1	1	Not Unique	Not Used	0.613721	1.07524	3	629.979	1887.92	0.434903
10800140	HIST1H2BB	histone H2B type 1-B [Homo sapiens]	1	22	1.18059		2.56264		13.9416	28.57	39.2066	Nucleus	DNA binding	Regulation of nucleobase, nucleoside, nucleotide and nucleic acid metabolism
															10800140	High	aMGIMNSFVNDIFER	N-Term(iTRAQ4plex)	6.42386	1	1	Not Unique	Not Used	1.25117	2.79279	2	944.46	1887.91	-4.47205
															10800140	High	aMGIMNSFVNDIFER	N-Term(iTRAQ4plex)	6.41658	1	1	Not Unique	Not Used	1.23533	2.65652	2	944.47	1887.93	6.39057
															10800140	High	aMGIMNSFVNDIFER	N-Term(iTRAQ4plex)	6.2498	1	1	Not Unique	Not Used	1.11834	2.49081	2	944.467	1887.93	2.9637
															10800140	High	aMGIMNSFVNDIFER	N-Term(iTRAQ4plex)	6.18209	1	1	Not Unique	Not Used	1.17103	2.5053	2	944.473	1887.94	9.17085
															10800140	High	aMGIMNSFVNDIFER	N-Term(iTRAQ4plex)	6.08211	1	1	Not Unique	Not Used	1.08043	2.6191	3	629.983	1887.93	6.64208
															10800140	High	aMGIMNSFVNDIFER	N-Term(iTRAQ4plex)	6.0127	1	1	Not Unique	Not Used	1.04783	2.79693	2	944.472	1887.94	8.20099
															10800140	High	aMGIMNSFVNDIFER	N-Term(iTRAQ4plex)	5.75721	1	1	Not Unique	Not Used	0.996075	2.20137	2	944.465	1887.92	0.506684
															10800140	High	aMGIMNSFVNDIFER	N-Term(iTRAQ4plex)	5.66016	1	1	Not Unique	Not Used	1.03595	1.59432	2	944.471	1887.93	6.51989
															10800140	High	aMGIMNSFVNDIFER	N-Term(iTRAQ4plex)	5.65297	1	1	Not Unique	Not Used	1.0204		3	629.986	1887.94	11.1034
															10800140	High	amGIMNSFVNDIFER	N-Term(iTRAQ4plex); M2(Oxidation)	5.58845	1	1	Not Unique	Not Used	1.07562	2.56175	2	952.468	1903.93	6.18662
															10800140	High	aMGIMNSFVNDIFER	N-Term(iTRAQ4plex)	5.58153	1	1	Not Unique	Not Used	1.51625	3.02778	3	629.98	1887.93	2.37465
															10800140	High	aMGIMNSFVNDIFER	N-Term(iTRAQ4plex)	5.51011	1	1	Not Unique	Not Used	1.07477		3	629.979	1887.92	0.725866
															10800140	High	amGIMNSFVNDIFER	N-Term(iTRAQ4plex); M2(Oxidation)	5.51005	1	1	Not Unique	Not Used	0.955187	1.72421	2	952.464	1903.92	2.66031
															10800140	High	amGIMNSFVNDIFER	N-Term(iTRAQ4plex); M2(Oxidation)	5.38156	1	1	Not Unique	Not Used	1.18908	1.75645	2	952.46	1903.91	-1.956
															10800140	High	aMGImNSFVNDIFER	N-Term(iTRAQ4plex); M5(Oxidation)	5.28147	1	1	Not Unique	Not Used	0.656191	1.25258	3	635.313	1903.92	3.64703
															10800140	High	aMGImNSFVNDIFER	N-Term(iTRAQ4plex); M5(Oxidation)	4.97884	1	1	Not Unique	Not Used	0.999109	2.2884	2	952.465	1903.92	2.91677
															10800140	High	aMGIMNSFVNDIFER	N-Term(iTRAQ4plex)	4.51751	1	1	Not Unique	Not Used	1.00887		3	629.979	1887.92	0.434903
															10800140	High	aMGIMNSFVNDIFER	N-Term(iTRAQ4plex)	4.20552	1	1	Not Unique	Not Used	1.09912	1.06334	3	629.976	1887.91	-4.5115
															10800140	High	kESYSIYVYk	N-Term(iTRAQ4plex); K1(iTRAQ4plex); K10(iTRAQ4plex)	4.19393	1	1	Unique	Used	1.18059	2.56264	2	856.483	1711.96	-3.00648
															10800140	High	qVHPDTGISSk	N-Term(iTRAQ4plex); K11(iTRAQ4plex)	3.90253	1	1	Not Unique	Not Used	0.839144	1.31394	3	486.272	1456.8	2.04713
															10800140	High	aMGIMNSFVNDIFER	N-Term(iTRAQ4plex)	3.73985	1	1	Not Unique	Not Used	1.02665	1.32655	2	944.471	1887.93	7.10181
															10800140	High	aMGIMNSFVNDIFER	N-Term(iTRAQ4plex)	3.28588	1	1	Not Unique	Not Used	0.613721	1.07524	3	629.979	1887.92	0.434903
20270303	RHOT2	mitochondrial Rho GTPase 2 [Homo sapiens]	1	2	1.14763		0.786889		68.0747	3.88	10.5924	Mitochondrion	GTPase activity	Cell communication,Signal transduction
															20270303	High	vPTHIVDYSEAEQTDEELREEIHk	N-Term(iTRAQ4plex); K24(iTRAQ4plex)	7.08659	1	1	Unique	Used	1.16306		4	789.639	3155.53	-13.0685
															20270303	High	vPTHIVDYSEAEQTDEELREEIHk	N-Term(iTRAQ4plex); K24(iTRAQ4plex)	3.50586	1	1	Unique	Used	1.13241	0.786889	3	1052.52	3155.54	-10.5303
22035620	PYCARD	apoptosis-associated speck-like protein containing a CARD isoform b [Homo sapiens]	2	4	0.994091	19.503	1.9513	34.0782	19.9564	17.61	12.9203	Cytoplasm	Caspase activator activity	Apoptosis
															22035620	High	dAILDALENLTAEELkk	N-Term(iTRAQ4plex); K16(iTRAQ4plex); K17(iTRAQ4plex)	7.40605	1	1	Unique	Used	1.28267	1.72029	3	773.45	2318.34	7.62451
															22035620	High	vTNVEWLLDALYGk	N-Term(iTRAQ4plex); K14(iTRAQ4plex)	5.75894	1	1	Unique	Used	1.11759	1.75415	2	955.037	1909.07	-0.164007
															22035620	High	dAILDALENLTAEELkk	N-Term(iTRAQ4plex); K16(iTRAQ4plex); K17(iTRAQ4plex)	5.51423	1	1	Unique	Used	0.572593	3.40854	4	580.337	2318.33	3.27475
															22035620	High	vTNVEWLLDALYGk	N-Term(iTRAQ4plex); K14(iTRAQ4plex)	5.00873	1	1	Unique	Used	1.14494	1.25054	3	637.028	1909.07	1.1078
29540535	SULT1A1	sulfotransferase 1A1 isoform a [Homo sapiens]	3	9	0.557928	15.2637	1.30606	18.7945	34.1432	26.78	10.5302	Cytoplasm	Sulfotransferase activity	Metabolism,Energy pathways
															29540535	High	dVAVSYYHFYHMAk	N-Term(iTRAQ4plex); K14(iTRAQ4plex)	5.88159	1	1	Unique	Used	0.664339	1.18308	3	673.664	2018.98	-13.4532
															29540535	High	tHPVLYLFYEDMk	N-Term(iTRAQ4plex); K13(iTRAQ4plex)	5.79055	1	1	Not Unique	Not Used	0.791804	1.10126	3	648.676	1944.01	-2.56876
															29540535	High	yFAEALGPLQSFQARPDDLLISTYPk	N-Term(iTRAQ4plex); K26(iTRAQ4plex)	5.08867	1	1	Unique	Used	0.461863	1.20742	3	1076.91	3228.73	3.41868
															29540535	High	tHLPLALLPQTLLDQk	N-Term(iTRAQ4plex); K16(iTRAQ4plex)	5.00532	1	1	Unique	Used	0.632288	1.51687	3	697.092	2089.26	-0.308433
															29540535	High	tHPVLYLFYEDMk	N-Term(iTRAQ4plex); K13(iTRAQ4plex)	4.73969	1	1	Not Unique	Not Used	0.780375	1.2705	2	972.511	1944.01	-1.93391
															29540535	High	tHLPLALLPQTLLDQk	N-Term(iTRAQ4plex); K16(iTRAQ4plex)	4.32368	1	1	Unique	Used	0.442186	0.888012	4	523.075	2089.28	6.75481
															29540535	High	tTFTVAQNER	N-Term(iTRAQ4plex)	3.91237	1	1	Not Unique	Not Used	0.956016	1.00189	2	655.843	1310.68	-3.1344
															29540535	High	tTFTVAQNER	N-Term(iTRAQ4plex)	3.79612	1	1	Not Unique	Not Used	0.96621	0.976286	2	655.843	1310.68	-2.48245
															29540535	High	yFAEALGPLQSFQARPDDLLISTYPk	N-Term(iTRAQ4plex); K26(iTRAQ4plex)	3.42706	1	1	Unique	Used	0.57675	1.67314	4	807.934	3228.71	-1.89745
29540564	ARMCX3	armadillo repeat-containing X-linked protein 3 [Homo sapiens]	2	4	1.38024	28.4002	0.805802	7.22774	42.4739	8.44	10.6497	Plasma membrane	Molecular function unknown	Embryonic development,Immune response
															29540564	High	mAEGGSGDVDDAGDcSGAR	N-Term(iTRAQ4plex); C15(Methylthio)	6.89623	1	1	Unique	Used	1.65803	0.752032	2	980.38	1959.75	-4.21927
															29540564	High	mAEGGSGDVDDAGDcSGAR	N-Term(iTRAQ4plex); C15(Methylthio)	6.46298	1	1	Unique	Used	1.61958	0.764548	2	980.383	1959.76	-0.668811
															29540564	High	mAEGGSGDVDDAGDcSGAR	N-Term(iTRAQ4plex); M1(Oxidation); C15(Methylthio)	4.18677	1	1	Unique	Used	1.48503	0.984696	2	988.377	1975.75	-4.57705
															29540564	High	vLGIESHHDFLVk	N-Term(iTRAQ4plex); K13(iTRAQ4plex)	3.98682	1	1	Unique	Used	0.931861	0.797707	3	594.669	1781.99	-13.1094
38016914	SAMHD1	SAM domain and HD domain-containing protein 1 [Homo sapiens]	3	5	1.05436	15.5941	1.49642	28.1238	72.1548	7.99	5.82239	Cytoplasm, Nucleus	GTPase activity	Immune response
															38016914	High	lkAEDFIVDVINMDYGMQEk	N-Term(iTRAQ4plex); K2(iTRAQ4plex); K20(iTRAQ4plex)	5.82239	1	1	Unique	Used	1.33908	1.06265	3	930.823	2790.46	4.75299
															38016914	High	eNEITGALLPcLDESR	N-Term(iTRAQ4plex); C11(Methylthio)	5.78718	1	1	Unique	Used	1.04396	1.84564	2	975.474	1949.94	-1.52635
															38016914	High	eNEITGALLPcLDESR	N-Term(iTRAQ4plex); C11(Methylthio)	5.41551	1	1	Unique	Used	0.929734	1.43871	2	975.479	1949.95	4.23302
															38016914	High	eNEITGALLPcLDESR	N-Term(iTRAQ4plex); C11(Methylthio)	5.37236	1	1	Unique	Used	0.989946	2.00624	2	975.477	1949.95	1.66635
															38016914	High	dkEVGNLYDMFHTR	N-Term(iTRAQ4plex); K2(iTRAQ4plex)	4.86843	1	1	Unique	Used	0.969059	1.12886	3	671.663	2012.97	-17.5808
51477708	HNRNPD	heterogeneous nuclear ribonucleoprotein D0 isoform d [Homo sapiens]	2	2	1.12941		1.6692		30.6531	5.57	7.29898	Nucleus	MRNA binding	Regulation of nucleobase, nucleoside, nucleotide and nucleic acid metabolism
															51477708	High	gFGFVLFk	N-Term(iTRAQ4plex); K8(iTRAQ4plex)	3.82123	1	1	Unique	Used	1.11832	1.70041	2	601.863	1202.72	0.668559
															51477708	High	gFcFITFk	N-Term(iTRAQ4plex); C3(Methylthio); K8(iTRAQ4plex)	3.47775	1	1	Unique	Used	1.14062	1.63856	2	648.841	1296.68	2.13479
52426774	HLA-DRA	HLA class II histocompatibility antigen, DR alpha chain precursor [Homo sapiens]	1	1	0.826573		1.45795		28.6027	6.69	5.91287	Plasma membrane	MHC class I receptor activity,MHC class II receptor activity	Immune response
															52426774	High	fHYLPFLPSTEDVYDcR	N-Term(iTRAQ4plex); C16(Methylthio)	5.91287	1	1	Unique	Used	0.826573	1.45795	3	764.693	2292.07	2.92595
62414289	VIM	vimentin [Homo sapiens]	11	21	0.978429	16.7468	1.66784	21.694	53.6191	25.97	19.285	Intermediate filament	Structural constituent of cytoskeleton	Cell growth and/or maintenance
															62414289	High	eMEENFAVEAANYQDTIGR	N-Term(iTRAQ4plex)	7.58853	1	1	Unique	Used	1.01033	1.23796	3	777.693	2331.06	-1.32074
															62414289	High	eMEENFAVEAANYQDTIGR	N-Term(iTRAQ4plex)	7.12631	1	1	Unique	Used	1.20534	2.0538	2	1166.04	2331.07	1.30336
															62414289	High	eMEENFAVEAANYQDTIGR	N-Term(iTRAQ4plex)	6.88914	1	1	Unique	Used	1.11916	1.90032	2	1166.03	2331.06	-4.14279
															62414289	High	eMEENFAVEAANYQDTIGR	N-Term(iTRAQ4plex)	6.59035	1	1	Unique	Used	1.06864	2.03563	2	1166.04	2331.08	3.81695
															62414289	High	kVESLQEEIAFLk	N-Term(iTRAQ4plex); K1(iTRAQ4plex); K13(iTRAQ4plex)	6.25067	1	1	Unique	Used	0.939843	1.95997	2	983.582	1966.16	-1.26991
															62414289	High	dGQVINETSQHHDDLE	N-Term(iTRAQ4plex)	6.15726	1	1	Unique	Used	0.592561	0.804617	3	660.972	1980.9	0.267283
															62414289	High	iLLAELEQLk	N-Term(iTRAQ4plex); K10(iTRAQ4plex)	4.93977	1	1	Unique	Used	1.00343	2.1096	2	729.464	1457.92	1.13868
															62414289	High	iLLAELEQLk	N-Term(iTRAQ4plex); K10(iTRAQ4plex)	4.83351	1	1	Unique	Used	0.837615	1.67431	2	729.467	1457.93	6.16239
															62414289	High	eYQDLLNVk	N-Term(iTRAQ4plex); K9(iTRAQ4plex)	4.47364	1	1	Unique	Used	0.871937	1.70874	2	705.39	1409.77	-10.2955
															62414289	High	eEAENTLQSFR	N-Term(iTRAQ4plex)	4.47001	1	1	Unique	Used	0.918278	2.06944	2	734.363	1467.72	-0.666866
															62414289	High	lQDEIQNMkEEMAR	N-Term(iTRAQ4plex); K9(iTRAQ4plex)	4.44276	1	1	Unique	Used	1.06982	1.48609	3	675.007	2023.01	-6.70732
															62414289	High	eYQDLLNVk	N-Term(iTRAQ4plex); K9(iTRAQ4plex)	4.30333	1	1	Unique	Used	1.14231	1.69046	2	705.391	1409.78	-8.91003
															62414289	High	eEAENTLQSFR	N-Term(iTRAQ4plex)	4.22278	1	1	Unique	Used	0.939857	1.86019	2	734.362	1467.72	-2.33027
															62414289	High	lQDEIQNMk	N-Term(iTRAQ4plex); K9(iTRAQ4plex)	4.16393	1	1	Unique	Used	1.02897	2.02778	2	703.879	1406.75	-2.7204
															62414289	High	iLLAELEQLk	N-Term(iTRAQ4plex); K10(iTRAQ4plex)	4.08402	1	1	Unique	Used	1.08814	1.86456	3	486.644	1457.92	-0.0427509
															62414289	High	lGDLYEEEMR	N-Term(iTRAQ4plex)	3.79036	1	1	Unique	Used	0.979873	2.03691	2	699.835	1398.66	-4.86407
															62414289	High	dNLAEDIMR	N-Term(iTRAQ4plex)	3.26513	1	1	Unique	Used	0.964777	1.62286	2	610.803	1220.6	-5.67224
															62414289	High	qDVDNASLAR	N-Term(iTRAQ4plex)	3.17326	1	1	Unique	Used	0.947936	1.74908	2	616.821	1232.63	-0.50722
															62414289	High	dNLAEDIMR	N-Term(iTRAQ4plex)	3.0918	1	1	Unique	Used	0.941911	1.25736	2	610.807	1220.61	0.328264
															62414289	High	lGDLYEEEMR	N-Term(iTRAQ4plex)	3.0153	1	1	Unique	Used	0.850417	1.38395	2	699.839	1398.67	0.459796
															62414289	High	qDVDNASLAR	N-Term(iTRAQ4plex)	2.93601	1	1	Unique	Used	0.826279	1.63374	2	616.822	1232.64	0.879227
109715858	CARHSP1	calcium-regulated heat stable protein 1 [Homo sapiens]	1	2	1.02443		0.628173		15.882	10.88	9.07361	Cytoplasm	Calcium ion binding	Cell communication,Signal transduction
															109715858	High	lQAVEVVITHLAPGTk	N-Term(iTRAQ4plex); K16(iTRAQ4plex)	5.77858	1	1	Unique	Used	0.943545	0.535892	3	655.401	1964.19	5.42804
															109715858	High	lQAVEVVITHLAPGTk	N-Term(iTRAQ4plex); K16(iTRAQ4plex)	3.29503	1	1	Unique	Used	1.11225	0.736345	2	982.598	1964.19	4.99985
117190254	HNRNPC	heterogeneous nuclear ribonucleoproteins C1/C2 isoform b [Homo sapiens]	1	1	1.0667		1.5339		32.3179	3.41	4.54809	Nucleus	RNA binding	Regulation of nucleobase, nucleoside, nucleotide and nucleic acid metabolism
															117190254	High	vDSLLENLEk	N-Term(iTRAQ4plex); K10(iTRAQ4plex)	4.54809	1	1	Unique	Used	1.0667	1.5339	2	724.411	1447.81	-7.11324
151301219	PRMT1	protein arginine N-methyltransferase 1 isoform 3 [Homo sapiens]	1	2	0.410965	20.5974	1.22372	9.19594	40.522	3.4	3.65452	Nucleus	Methyltransferase activity	Metabolism,Energy pathways
															151301219	High	wLAPDGLIFPDR	N-Term(iTRAQ4plex)	3.65452	1	1	Unique	Used	0.47082	1.14415	2	772.428	1543.85	6.18846
															151301219	High	wLAPDGLIFPDR	N-Term(iTRAQ4plex)	3.21489	1	1	Unique	Used	0.351109	1.3033	2	772.423	1543.84	-0.295189
153251270	CPPED1	calcineurin-like phosphoesterase domain-containing protein 1 isoform a [Homo sapiens]	1	1	0.838389		1.56		35.5259	8.6	7.10297	-	Molecular function unknown	Biological_process unknown
															153251270	High	aIPLVLVSGNHDIGNTPTAETVEEFcR	N-Term(iTRAQ4plex); C26(Methylthio)	7.10297	1	1	Unique	Used	0.838389	1.56	3	1024.85	3072.53	1.40237
194239731	EEF1D	elongation factor 1-delta isoform 2 [Homo sapiens]	1	4	0.810589		1.95398		31.1028	17.08	8.66076	Endoplasmic reticulum	Guanyl-nucleotide exchange factor activity	Cell communication,Signal transduction
															194239731	High	sLAGSSGPGASSGTSGDHGELVVR	N-Term(iTRAQ4plex)	8.66076	1	1	Unique	Used	0.810589	1.95398	3	777.056	2329.15	0.823659
															194239731	High	gVVQELQQAISk	N-Term(iTRAQ4plex); K12(iTRAQ4plex)	5.69932	1	1	Not Unique	Not Used	1.00545	1.22846	2	794.461	1587.92	-9.86738
															194239731	High	iASLEVENQSLR	N-Term(iTRAQ4plex)	4.23808	1	1	Not Unique	Not Used	1.06184	0.989167	2	751.918	1502.83	-0.587838
															194239731	High	iASLEVENQSLR	N-Term(iTRAQ4plex)	3.53916	1	1	Not Unique	Not Used	1.09719	1.20399	2	751.915	1502.82	-4.89289
209862831	ANXA2	annexin A2 isoform 2 [Homo sapiens]	11	23	0.960511	7.3264	1.49092	10.7259	38.5798	38.05	31.0749	Nucleus	Calcium ion binding	Cell communication,Signal transduction
															209862831	High	gLGTDEDSLIEIIcSR	N-Term(iTRAQ4plex); C14(Methylthio)	7.02989	1	1	Unique	Used	0.980384	1.578	2	955.977	1910.95	7.34046
															209862831	High	tDLEkDIISDTSGDFR	N-Term(iTRAQ4plex); K5(iTRAQ4plex)	6.16882	1	1	Unique	Used	1.09343	1.52349	2	1050.54	2100.07	-1.91029
															209862831	High	aEDGSVIDYELIDQDAR	N-Term(iTRAQ4plex)	5.8399	1	1	Unique	Used	0.918545	1.59026	2	1027	2052.98	-0.532106
															209862831	High	gVDEVTIVNILTNR	N-Term(iTRAQ4plex)	5.69726	1	1	Unique	Used	0.803637		3	562.988	1686.95	0.0625486
															209862831	High	rAEDGSVIDYELIDQDAR	N-Term(iTRAQ4plex)	5.6803	1	1	Unique	Used	0.932631	1.70296	2	1105.04	2209.08	-2.50453
															209862831	High	lSLEGDHSTPPSAYGSVk	N-Term(iTRAQ4plex); K18(iTRAQ4plex)	5.45018	1	1	Unique	Used	0.902969	1.41029	3	711.706	2133.1	-1.09421
															209862831	High	gVDEVTIVNILTNR	N-Term(iTRAQ4plex)	5.31725	1	1	Unique	Used	0.612193		3	562.992	1686.96	7.22629
															209862831	High	gVDEVTIVNILTNR	N-Term(iTRAQ4plex)	5.2831	1	1	Unique	Used	0.999266	1.56493	2	843.978	1686.95	-0.725458
															209862831	High	aEDGSVIDYELIDQDAR	N-Term(iTRAQ4plex)	5.26187	1	1	Unique	Used	0.860007	1.76641	2	1026.99	2052.98	-0.888866
															209862831	High	gVDEVTIVNILTNR	N-Term(iTRAQ4plex)	5.25648	1	1	Unique	Used	1.05864	1.91081	2	843.981	1686.95	1.80719
															209862831	High	gVDEVTIVNILTNR	N-Term(iTRAQ4plex)	5.2409	1	1	Unique	Used	1.08084	1.46003	2	843.983	1686.96	5.06344
															209862831	High	gVDEVTIVNILTNR	N-Term(iTRAQ4plex)	5.20053	1	1	Unique	Used	0.968767	0.680576	3	562.99	1686.95	2.12485
															209862831	High	gVDEVTIVNILTNR	N-Term(iTRAQ4plex)	5.12453	1	1	Unique	Used	1.03608	1.2977	2	843.977	1686.95	-2.02797
															209862831	High	gVDEVTIVNILTNR	N-Term(iTRAQ4plex)	5.11011	1	1	Unique	Used	0.982071	1.46018	2	843.98	1686.95	1.66247
															209862831	High	gLGTDEDSLIEIIcSR	N-Term(iTRAQ4plex); C14(Methylthio)	5.0382	1	1	Unique	Used	0.788735	1.50652	3	637.651	1910.94	3.05351
															209862831	High	sYSPYDMLESIR	N-Term(iTRAQ4plex)	4.5835	1	1	Unique	Used	0.884719	1.72236	2	802.893	1604.78	2.27671
															209862831	High	sYSPYDMLESIR	N-Term(iTRAQ4plex)	4.44263	1	1	Unique	Used	0.960843	1.89355	2	802.889	1604.77	-1.90697
															209862831	High	tNQELQEINR	N-Term(iTRAQ4plex)	4.37633	1	1	Unique	Used	1.0775	1.67152	2	694.865	1388.72	-2.05133
															209862831	High	dIISDTSGDFR	N-Term(iTRAQ4plex)	3.95551	1	1	Unique	Used	0.837759	1.80495	2	685.338	1369.67	-1.57929
															209862831	High	dIISDTSGDFR	N-Term(iTRAQ4plex)	3.75816	1	1	Unique	Used	0.842786	1.74608	2	685.34	1369.67	0.29231
															209862831	High	sALSGHLETVILGLLk	N-Term(iTRAQ4plex); K16(iTRAQ4plex)	3.47484	1	1	Unique	Used		1.08761	4	485.552	1939.18	0.712489
															209862831	High	qDIAFAYQR	N-Term(iTRAQ4plex)	3.25962	1	1	Unique	Used	1.2046	1.1321	2	628.329	1255.65	-4.16864
															209862831	High	dIISDTSGDFR	N-Term(iTRAQ4plex)	3.09623	1	1	Unique	Used	0.825222	1.20792	2	685.336	1369.67	-4.43127
223278374	DCLRE1A	DNA cross-link repair 1A protein [Homo sapiens]	1	1	1.58761		1.31417		116.326	1.35	2.95751	Nucleus	DNA repair protein	Regulation of nucleobase, nucleoside, nucleotide and nucleic acid metabolism
															223278374	High	aDPSMERSLLADQk	N-Term(iTRAQ4plex); K14(iTRAQ4plex)	2.95751	1	1	Unique	Used	1.58761	1.31417	2	924.983	1848.96	-7.60399
223555921	VPS37A	vacuolar protein sorting-associated protein 37A isoform 2 [Homo sapiens]	1	1	0.697723		1.15938		41.43	3.49	3.2122	Nucleus	Molecular function unknown	Transport
															223555921	High	mEIDDFLSSFMEk	N-Term(iTRAQ4plex); K13(iTRAQ4plex)	3.2122	1	1	Unique	Used	0.697723	1.15938	3	627.308	1879.91	1.08405
224451038	YIF1B	protein YIF1B isoform 2 [Homo sapiens]	1	2	1.46334	7.99301	0.684814	2.63668	31.1542	4.59	4.0138	-	Molecular function unknown	Biological_process unknown
															224451038	High	iLADAAAEGVPVR	N-Term(iTRAQ4plex)	4.0138	1	1	Unique	Used	1.38063	0.672046	2	713.412	1425.82	-1.70485
															224451038	High	iLADAAAEGVPVR	N-Term(iTRAQ4plex)	3.91088	1	1	Unique	Used	1.54605	0.697582	2	713.412	1425.82	-1.70485
351721324	SET	protein SET isoform 4 [Homo sapiens]	1	2	1.0193		1.81886		31.1053	5.26	10.2848	Nucleus	MHC class I receptor activity,MHC class II receptor activity	Regulation of nucleobase, nucleoside, nucleotide and nucleic acid metabolism
															351721324	High	iDFYFDENPYFENk	N-Term(iTRAQ4plex); K14(iTRAQ4plex)	6.07421	1	1	Unique	Used	1.01815	2.08556	2	1065.01	2129.01	-0.157724
															351721324	High	iDFYFDENPYFENk	N-Term(iTRAQ4plex); K14(iTRAQ4plex)	4.21057	1	1	Unique	Used	1.02046	1.58626	3	710.34	2129.01	-2.40017
371502127	CAPG	macrophage-capping protein isoform 2 [Homo sapiens]	3	3	1.01844	4.45175	1.58517	36.4022	36.8337	15.02	9.31964	Cytoplasm	Cytoskeletal protein binding	Cell growth and/or maintenance
															371502127	High	mQYAPNTQVEILPQGHESPIFk	N-Term(iTRAQ4plex); K22(iTRAQ4plex)	9.31964	1	1	Unique	Used	1.06788	1.21498	3	939.163	2815.47	1.95607
															371502127	High	eVQGNESDLFMSYFPR	N-Term(iTRAQ4plex)	6.42465	1	1	Unique	Used	0.978824	2.25005	2	1031.99	2062.98	4.60463
															371502127	High	vSDATGQMNLTk	N-Term(iTRAQ4plex); K12(iTRAQ4plex)	4.16622	1	1	Unique	Used	1.0086	1.29048	2	776.915	1552.82	-1.24419
10863945	XRCC5	X-ray repair cross-complementing protein 5 [Homo sapiens]	2	2	1.01472	8.9329	1.51506	2.98343	82.6523	3.28	4.95638	Nucleus	DNA repair protein	Regulation of nucleobase, nucleoside, nucleotide and nucleic acid metabolism
															10863945	High	hLMLPDFDLLEDIESk	N-Term(iTRAQ4plex); K16(iTRAQ4plex)	4.95638	1	1	Unique	Used	1.07882	1.54702	2	1102.09	2203.17	4.9149
															10863945	High	lFQcLLHR	N-Term(iTRAQ4plex); C4(Methylthio)	3.34164	1	1	Unique	Used	0.950625	1.4831	3	407.223	1219.65	-2.23945
118601081	HNRNPUL2	heterogeneous nuclear ribonucleoprotein U-like protein 2 [Homo sapiens]	1	1	1.13597		1.36082		85.0522	2.95	8.07792	Nucleus	RNA binding	Regulation of nucleobase, nucleoside, nucleotide and nucleic acid metabolism
															118601081	High	eEPFFPPPEEFVFIHAVPVEER	N-Term(iTRAQ4plex)	8.07792	1	1	Unique	Used	1.13597	1.36082	3	929.138	2785.4	0.173487
14141161	HNRNPU	heterogeneous nuclear ribonucleoprotein U isoform b [Homo sapiens]	1	2	1.12946	39.295	1.38145	21.3825	88.9242	2.73	8.2383	Cytoplasm, Nucleus	RNA binding	Regulation of nucleobase, nucleoside, nucleotide and nucleic acid metabolism
															14141161	High	ekPYFPIPEEYTFIQNVPLEDR	N-Term(iTRAQ4plex); K2(iTRAQ4plex)	8.2383	1	1	Unique	Used	1.44329	1.17258	3	1004.86	3012.58	6.78722
															14141161	High	ekPYFPIPEEYTFIQNVPLEDR	N-Term(iTRAQ4plex); K2(iTRAQ4plex)	6.06427	1	1	Unique	Used	0.815632	1.59032	3	1004.85	3012.54	-4.94343
14210536	TUBB6	tubulin beta-6 chain [Homo sapiens]	1	33	1.11901	1.85325	0.757147	5.89152	49.825	16.82	46.5241	-	Structural constituent of cytoskeleton	Cell growth and/or maintenance
															14210536	High	mASTFIGNSTAIQELFk	N-Term(iTRAQ4plex); K17(iTRAQ4plex)	7.23342	1	1	Unique	Used	0.867717	0.870983	3	716.05	2146.14	-4.46605
															14210536	High	mASTFIGNSTAIQELFk	N-Term(iTRAQ4plex); K17(iTRAQ4plex)	6.96335	1	1	Unique	Used	1.10435	0.788689	3	716.053	2146.15	-0.0294784
															14210536	High	lHFFMPGFAPLTSR	N-Term(iTRAQ4plex)	6.37394	1	1	Not Unique	Not Used	1.00842	1.0778	3	588.988	1764.95	5.90325
															14210536	High	lHFFMPGFAPLTSR	N-Term(iTRAQ4plex)	6.25932	1	1	Not Unique	Not Used	0.768865	0.98236	3	588.988	1764.95	6.52572
															14210536	High	lHFFMPGFAPLTSR	N-Term(iTRAQ4plex)	5.93957	1	1	Not Unique	Not Used	0.8073	0.932291	3	588.985	1764.94	2.27217
															14210536	High	lHFFMPGFAPLTSR	N-Term(iTRAQ4plex)	5.68838	1	1	Not Unique	Not Used	0.925047	1.02549	3	588.989	1764.95	8.39312
															14210536	High	lHFFMPGFAPLTSR	N-Term(iTRAQ4plex)	5.64022	1	1	Not Unique	Not Used	0.863761	0.967456	3	588.988	1764.95	6.11074
															14210536	High	lHFFMPGFAPLTSR	N-Term(iTRAQ4plex)	5.60601	1	1	Not Unique	Not Used	1.03969	1.13851	3	588.983	1764.94	-1.35894
															14210536	High	lHFFMPGFAPLTSR	N-Term(iTRAQ4plex)	5.58808	1	1	Not Unique	Not Used	0.817736	0.89932	3	588.987	1764.95	4.45082
															14210536	High	mASTFIGNSTAIQELFk	N-Term(iTRAQ4plex); K17(iTRAQ4plex)	5.52698	1	1	Unique	Used	1.48116	0.604492	3	716.053	2146.14	-0.626707
															14210536	High	nSSYFVEWIPNNVk	N-Term(iTRAQ4plex); K14(iTRAQ4plex)	5.44638	1	1	Not Unique	Not Used	1.0324	0.98919	2	993.014	1985.02	-8.16398
															14210536	High	lHFFmPGFAPLTSR	N-Term(iTRAQ4plex); M5(Oxidation)	5.34945	1	1	Not Unique	Not Used	0.927996	1.11608	3	594.315	1780.93	-1.50738
															14210536	High	lHFFMPGFAPLTSR	N-Term(iTRAQ4plex)	5.33477	1	1	Not Unique	Not Used	0.970727	1.08568	3	588.986	1764.94	2.68715
															14210536	High	nSSYFVEWIPNNVk	N-Term(iTRAQ4plex); K14(iTRAQ4plex)	4.51455	1	1	Not Unique	Not Used	1.13202	1.0121	2	993.02	1985.03	-2.13739
															14210536	High	lHFFMPGFAPLTSR	N-Term(iTRAQ4plex)	4.46203	1	1	Not Unique	Not Used	0.934957	1.00274	2	882.975	1764.94	2.76393
															14210536	High	lHFFMPGFAPLTSR	N-Term(iTRAQ4plex)	4.37603	1	1	Not Unique	Not Used	1.25614	1.13043	3	588.985	1764.94	1.33846
															14210536	High	lHFFMPGFAPLTSR	N-Term(iTRAQ4plex)	4.35807	1	1	Not Unique	Not Used	0.861628	0.98578	2	882.978	1764.95	5.94545
															14210536	High	lHFFMPGFAPLTSR	N-Term(iTRAQ4plex)	4.18503	1	1	Not Unique	Not Used	0.911617	0.59331	3	588.986	1764.94	3.30962
															14210536	High	kLAVNMVPFPR	N-Term(iTRAQ4plex); K1(iTRAQ4plex)	3.95356	1	1	Not Unique	Not Used	1.13253	0.860205	2	780.465	1559.92	-6.85945
															14210536	High	lHFFMPGFAPLTSR	N-Term(iTRAQ4plex)	3.9452	1	1	Not Unique	Not Used	1.07033	1.00413	3	588.977	1764.92	-12.2524
															14210536	High	lAVNMVPFPR	N-Term(iTRAQ4plex)	3.89016	1	1	Not Unique	Not Used	1.1646	0.684863	2	644.371	1287.74	-0.622021
															14210536	High	lHFFMPGFAPLTSR	N-Term(iTRAQ4plex)	3.6161	1	1	Not Unique	Not Used	0.704172	0.960493	2	882.976	1764.94	3.87055
															14210536	High	nSSYFVEWIPNNVk	N-Term(iTRAQ4plex); K14(iTRAQ4plex)	3.58932	1	1	Not Unique	Not Used	0.645029	0.747299	3	662.347	1985.03	-5.49568
															14210536	High	lHFFmPGFAPLTSR	N-Term(iTRAQ4plex); M5(Oxidation)	3.37767	1	1	Not Unique	Not Used	1.05416	1.73814	3	594.322	1780.95	10.3162
															14210536	High	vAVcDIPPR	N-Term(iTRAQ4plex); C4(Methylthio)	3.19791	1	1	Not Unique	Not Used	0.882046	0.8407	2	580.308	1159.61	0.0972799
															14210536	High	lAVNMVPFPR	N-Term(iTRAQ4plex)	3.15607	1	1	Not Unique	Not Used	1.32148	0.679394	2	644.369	1287.73	-4.03464
															14210536	High	vAVcDIPPR	N-Term(iTRAQ4plex); C4(Methylthio)	3.08935	1	1	Not Unique	Not Used	0.92137	0.807928	2	580.305	1159.6	-5.58725
															14210536	High	fPGQLNADLR	N-Term(iTRAQ4plex)	2.99085	1	1	Not Unique	Not Used	0.805671	0.96544	2	637.853	1274.7	0.981955
															14210536	High	vAVcDIPPR	N-Term(iTRAQ4plex); C4(Methylthio)	2.98733	1	1	Not Unique	Not Used	0.838402	0.75607	2	580.308	1159.61	0.0972799
															14210536	High	vAVcDIPPR	N-Term(iTRAQ4plex); C4(Methylthio)	2.97805	1	1	Not Unique	Not Used	1.10707	0.908464	2	580.304	1159.6	-6.63995
															14210536	High	fPGQLNADLR	N-Term(iTRAQ4plex)	2.97366	1	1	Not Unique	Not Used	0.841415	0.986542	2	637.852	1274.7	0.0243148
															14210536	High	fPGQLNADLR	N-Term(iTRAQ4plex)	2.95185	1	1	Not Unique	Not Used	0.917086	0.902089	2	637.85	1274.69	-4.09356
															14210536	High	vAVcDIPPR	N-Term(iTRAQ4plex); C4(Methylthio)	2.91995	1	1	Not Unique	Not Used	0.939178	0.93857	2	580.305	1159.6	-4.42929
14277700	RPS12	40S ribosomal protein S12 [Homo sapiens]	2	2	1.0638	4.57793	1.53039	3.27825	14.5055	18.18	6.66255	Ribosome	Structural constituent of ribosome	Protein metabolism
															14277700	High	lVEALcAEHQINLIk	N-Term(iTRAQ4plex); C6(Methylthio); K15(iTRAQ4plex)	6.66255	1	1	Unique	Used	1.09823	1.56586	3	676.716	2028.13	5.59377
															14277700	High	lGEWVGLck	N-Term(iTRAQ4plex); C8(Methylthio); K9(iTRAQ4plex)	3.88956	1	1	Unique	Used	1.02936	1.49491	2	669.859	1338.71	-4.02016
33356148	FMNL1	formin-like protein 1 [Homo sapiens]	1	1	1.23381		2.19004		121.751	1.82	7.8424	Cytoplasm	Cell adhesion molecule activity	Cell growth and/or maintenance
															33356148	High	nAVLEHMEELQEQVALLTER	N-Term(iTRAQ4plex)	7.8424	1	1	Unique	Used	1.23381	2.19004	3	832.774	2496.31	7.69501
4505227	MNDA	myeloid cell nuclear differentiation antigen [Homo sapiens]	3	4	1.18682	9.444	1.82399	14.275	45.8072	10.57	6.79549	Nucleus	Transcription factor activity	Regulation of nucleobase, nucleoside, nucleotide and nucleic acid metabolism
															4505227	High	eASSVSDFNQNFEVPNR	N-Term(iTRAQ4plex)	6.79549	1	1	Unique	Used	1.23269	2.10633	2	1042.49	2083.97	-2.54475
															4505227	High	eASSVSDFNQNFEVPNR	N-Term(iTRAQ4plex)	6.77824	1	1	Unique	Used	1.06481	1.8225	2	1042.49	2083.98	-0.787473
															4505227	High	gFELMDDYHFTSIk	N-Term(iTRAQ4plex); K14(iTRAQ4plex)	5.34826	1	1	Unique	Used	1.13056	1.8888	3	664.334	1990.99	2.27187
															4505227	High	sLLAYDLGLTTk	N-Term(iTRAQ4plex); K12(iTRAQ4plex)	5.17355	1	1	Unique	Used	1.31924	1.47835	2	791.961	1582.91	-9.54762
46409324	SPRYD4	SPRY domain-containing protein 4 [Homo sapiens]	1	1	1.11046		0.655693		23.084	9.66	8.24184	-	Molecular function unknown	Biological_process unknown
															46409324	High	lSLVDVSQVSVVHTLQTDFR	N-Term(iTRAQ4plex)	8.24184	1	1	Unique	Used	1.11046	0.655693	3	796.441	2387.31	1.19099
5730027	KHDRBS1	KH domain-containing, RNA-binding, signal transduction-associated protein 1 [Homo sapiens]	1	1	1.10936		2.12885		48.1972	4.51	5.47078	Nucleus	RNA binding	Regulation of nucleobase, nucleoside, nucleotide and nucleic acid metabolism
															5730027	High	dSLDPSFTHAMQLLTAEIEk	N-Term(iTRAQ4plex); K20(iTRAQ4plex)	5.47	1	1	Unique	Used	1.10936	2.12885	3	845.446	2534.32	7.05313
5902090	SLC2A3	solute carrier family 2, facilitated glucose transporter member 3 [Homo sapiens]	5	20	1.53187	34.7605	0.848456	11.0401	53.8893	10.28	27.2187	Plasma membrane	Auxiliary transport protein activity	Transport
															5902090	High	lWGTQDVSQDIQEMkDESAR	N-Term(iTRAQ4plex); K15(iTRAQ4plex)	7.56585	1	1	Unique	Used	1.90762	0.638869	4	656.828	2624.29	1.56721
															5902090	High	lWGTQDVSQDIQEMkDESAR	N-Term(iTRAQ4plex); K15(iTRAQ4plex)	7.23051	1	1	Unique	Used	3.70608	0.620341	4	656.832	2624.3	6.77692
															5902090	High	lWGTQDVSQDIQEMk	N-Term(iTRAQ4plex); K15(iTRAQ4plex)	6.78884	1	1	Unique	Used	1.60994	0.705614	2	1033.52	2066.04	-2.86452
															5902090	High	lWGTQDVSQDIQEMkDESAR	N-Term(iTRAQ4plex); K15(iTRAQ4plex)	6.59781	1	1	Unique	Used	2.42528	0.711235	2	1312.65	2624.3	5.15914
															5902090	High	lWGTQDVSQDIQEMkDESAR	N-Term(iTRAQ4plex); K15(iTRAQ4plex)	6.58606	1	1	Unique	Used	1.64863	0.792431	2	1312.65	2624.29	2.36822
															5902090	High	lWGTQDVSQDIQEMkDESAR	N-Term(iTRAQ4plex); K15(iTRAQ4plex)	6.33853	1	1	Unique	Used	2.3877	0.716059	3	875.436	2624.29	2.45613
															5902090	High	lWGTQDVSQDIQEMk	N-Term(iTRAQ4plex); K15(iTRAQ4plex)	5.66507	1	1	Unique	Used	1.87177	0.807701	2	1033.51	2066.02	-12.5544
															5902090	High	lWGTQDVSQDIQEMk	N-Term(iTRAQ4plex); K15(iTRAQ4plex)	5.64538	1	1	Unique	Used	1.05921	0.773741	3	689.352	2066.04	-2.39835
															5902090	High	lWGTQDVSQDIQEMk	N-Term(iTRAQ4plex); K15(iTRAQ4plex)	5.06095	1	1	Unique	Used	1.7759	0.813472	3	689.347	2066.03	-9.7544
															5902090	High	dGVMEMNSIEPAk	N-Term(iTRAQ4plex); K13(iTRAQ4plex)	4.91136	1	1	Unique	Used	0.980296	0.996342	2	854.917	1708.83	-13.1281
															5902090	High	lWGTQDVSQDIQEmkDESAR	N-Term(iTRAQ4plex); M14(Oxidation); K15(iTRAQ4plex)	4.46388	1	1	Unique	Used	1.70842	0.903743	3	880.763	2640.27	-2.79906
															5902090	High	lWGTQDVSQDIQEmkDESAR	N-Term(iTRAQ4plex); M14(Oxidation); K15(iTRAQ4plex)	4.13529	1	1	Unique	Used	1.17787	0.867873	3	880.764	2640.28	-1.48139
															5902090	High	dGVMEMNSIEPAk	N-Term(iTRAQ4plex); K13(iTRAQ4plex)	4.06602	1	1	Unique	Used	0.809069	1.10656	2	854.924	1708.84	-5.34165
															5902090	High	qVTVLELFR	N-Term(iTRAQ4plex)	3.7835	1	1	Unique	Used	0.903656	0.950419	2	624.875	1248.74	-0.742452
															5902090	High	qVTVLELFR	N-Term(iTRAQ4plex)	3.69253	1	1	Unique	Used	1.42128	0.962757	2	624.874	1248.74	-2.01326
															5902090	High	qVTVLELFR	N-Term(iTRAQ4plex)	3.60297	1	1	Unique	Used	1.252	0.991384	2	624.876	1248.74	1.21264
															5902090	High	qVTVLELFR	N-Term(iTRAQ4plex)	3.52113	1	1	Unique	Used	1.13607	1.0159	2	624.876	1248.74	1.01713
															5902090	High	sVEMLILGR	N-Term(iTRAQ4plex)	3.50484	1	1	Unique	Used	1.28711	0.938993	2	581.341	1161.67	-3.66411
															5902090	High	qVTVLELFR	N-Term(iTRAQ4plex)	3.49269	1	1	Unique	Used	1.24738	0.840812	2	624.876	1248.74	1.01713
															5902090	High	sVEMLILGR	N-Term(iTRAQ4plex)	3.37857	1	1	Unique	Used	1.19951	0.869971	2	581.343	1161.68	0.118815
6679189	TMED3	transmembrane emp24 domain-containing protein 3 precursor [Homo sapiens]	1	1	2.11013		1.09654		24.7613	8.76	8.93376	Integral to membrane	Molecular function unknown	Biological_process unknown
															6679189	High	vTALTQMESAcVTIHEALk	N-Term(iTRAQ4plex); C11(Methylthio); K19(iTRAQ4plex)	8.93376	1	1	Unique	Used	2.11013	1.09654	3	793.752	2379.24	3.92442
38455427	CCT4	T-complex protein 1 subunit delta isoform b [Homo sapiens]	1	19	0.881737	9.09937	0.926765	9.56149	57.8878	19.11	21.1496	Cytoplasm	Chaperone activity	Protein metabolism
															38455427	High	lGGTIDDcELVEGLVLTQk	N-Term(iTRAQ4plex); C8(Methylthio); K19(iTRAQ4plex)	6.27228	1	1	Not Unique	Not Used	1.21649	0.935513	2	1169.12	2337.24	5.67272
															38455427	High	lGGTIDDcELVEGLVLTQk	N-Term(iTRAQ4plex); C8(Methylthio); K19(iTRAQ4plex)	5.90098	1	1	Not Unique	Not Used	0.985445	0.879702	3	779.751	2337.24	4.07401
															38455427	High	gDVTITNDGATILk	N-Term(iTRAQ4plex); K14(iTRAQ4plex)	5.84877	1	1	Unique	Used	0.825004	0.989423	2	853.478	1705.95	-5.11108
															38455427	High	gDVTITNDGATILk	N-Term(iTRAQ4plex); K14(iTRAQ4plex)	5.51444	1	1	Unique	Used	0.938469	0.864106	2	853.472	1705.94	-11.6227
															38455427	High	dALSDLALHFLNk	N-Term(iTRAQ4plex); K13(iTRAQ4plex)	5.49841	1	1	Not Unique	Not Used	1.07861	0.808429	3	582.338	1745	8.65623
															38455427	High	aLIAGGGAPEIELALR	N-Term(iTRAQ4plex)	5.18071	1	1	Not Unique	Not Used	1.06104	0.905752	2	848.005	1695	6.04996
															38455427	High	aLIAGGGAPEIELALR	N-Term(iTRAQ4plex)	5.02265	1	1	Not Unique	Not Used	0.983532	0.822645	2	847.998	1694.99	-2.44815
															38455427	High	dALSDLALHFLNk	N-Term(iTRAQ4plex); K13(iTRAQ4plex)	4.65788	1	1	Not Unique	Not Used	1.08599	0.880915	3	582.334	1744.99	2.46528
															38455427	High	vIDPATATSVDLR	N-Term(iTRAQ4plex)	4.55171	1	1	Not Unique	Not Used	1.10303	0.852936	2	751.419	1501.83	-2.13207
															38455427	High	vIDPATATSVDLR	N-Term(iTRAQ4plex)	4.54904	1	1	Not Unique	Not Used	0.989502	0.861846	2	751.421	1501.83	-0.26261
															38455427	High	dIEREDIEFIck	N-Term(iTRAQ4plex); C11(Methylthio); K12(iTRAQ4plex)	4.13122	1	1	Not Unique	Not Used	1.17101	0.965968	3	615.309	1843.91	-2.59696
															38455427	High	vIDPATATSVDLR	N-Term(iTRAQ4plex)	4.0846	1	1	Not Unique	Not Used	1.12478	1.08182	2	751.42	1501.83	-1.40054
															38455427	High	aYILNLVk	N-Term(iTRAQ4plex); K8(iTRAQ4plex)	3.92591	1	1	Not Unique	Not Used	1.13541	0.977814	2	611.388	1221.77	-9.8962
															38455427	High	aYILNLVk	N-Term(iTRAQ4plex); K8(iTRAQ4plex)	3.92354	1	1	Not Unique	Not Used	0.834692	0.940746	2	611.391	1221.78	-4.6008
															38455427	High	aLIAGGGAPEIELALR	N-Term(iTRAQ4plex)	3.76423	1	1	Not Unique	Not Used	1.09691	1.1164	2	847.998	1694.99	-2.59219
															38455427	High	dALSDLALHFLNk	N-Term(iTRAQ4plex); K13(iTRAQ4plex)	3.63048	1	1	Not Unique	Not Used	0.665312	1.15043	3	582.336	1744.99	6.34775
															38455427	High	dIEREDIEFIck	N-Term(iTRAQ4plex); C11(Methylthio); K12(iTRAQ4plex)	3.58298	1	1	Not Unique	Not Used	0.755908	0.83909	3	615.31	1843.91	-1.80253
															38455427	High	lVIEEAER	N-Term(iTRAQ4plex)	3.22171	1	1	Not Unique	Not Used	0.939134	0.949036	2	551.815	1102.62	-0.350427
															38455427	High	lVIEEAER	N-Term(iTRAQ4plex)	3.12758	1	1	Not Unique	Not Used	0.941982	0.885127	2	551.812	1102.62	-5.00023
71773329	ANXA6	annexin A6 isoform 1 [Homo sapiens]	13	20	1.0946	15.5315	1.56617	16.2558	75.8256	23.18	23.048	Endoplasmic reticulum	Calcium ion binding	Cell communication,Signal transduction
															71773329	High	gSIHDFPGFDPNQDAEALYTAMk	N-Term(iTRAQ4plex); K23(iTRAQ4plex)	8.28279	1	1	Unique	Used	1.12349	1.52769	3	938.128	2812.37	6.81382
															71773329	High	gLGTDEDTIIDIITHR	N-Term(iTRAQ4plex)	6.96335	1	1	Unique	Used	0.812817	1.73012	3	638.346	1913.02	7.95713
															71773329	High	wGTDEAQFIYILGNR	N-Term(iTRAQ4plex)	6.38418	1	1	Unique	Used	1.29119	1.58793	2	963.998	1926.99	3.41326
															71773329	High	wGTDEAQFIYILGNR	N-Term(iTRAQ4plex)	6.27502	1	1	Unique	Used	1.32588	1.56002	2	964.001	1926.99	5.69377
															71773329	High	wGTDEAQFIYILGNR	N-Term(iTRAQ4plex)	5.96543	1	1	Unique	Used	1.26482	1.60017	2	963.999	1926.99	4.42682
															71773329	High	gLGTDEDTIIDIITHR	N-Term(iTRAQ4plex)	5.94463	1	1	Unique	Used	0.863095	1.01017	3	638.346	1913.02	6.90427
															71773329	High	gLGTDEDTIIDIITHR	N-Term(iTRAQ4plex)	5.77715	1	1	Unique	Used	0.906789	2.74265	3	638.346	1913.02	6.61713
															71773329	High	lILGLMMPPAHYDAk	N-Term(iTRAQ4plex); K15(iTRAQ4plex)	5.77424	1	1	Unique	Used	1.11545	2.11104	3	653.366	1958.08	-0.663996
															71773329	High	tNEQMHQLVAAYk	N-Term(iTRAQ4plex); K13(iTRAQ4plex)	4.31093	1	1	Unique	Used	0.938759	1.59964	3	607.654	1820.95	-5.13219
															71773329	High	gFGSDkEAILDIITSR	N-Term(iTRAQ4plex); K6(iTRAQ4plex)	4.30895	1	1	Unique	Used	1.37255	1.5736	3	670.708	2010.11	-1.33612
															71773329	High	gFGSDkEAILDIITSR	N-Term(iTRAQ4plex); K6(iTRAQ4plex)	3.99967	1	1	Unique	Used	1.23109	1.6258	3	670.711	2010.12	4.1294
															71773329	High	eAILDIITSR	N-Term(iTRAQ4plex)	3.66446	1	1	Unique	Used	1.20255	1.44938	2	637.875	1274.74	-1.5199
															71773329	High	lIVGLMRPPAYcDAk	N-Term(iTRAQ4plex); C12(Methylthio); K15(iTRAQ4plex)	3.65201	1	1	Unique	Used	1.31976	1.75522	3	661.028	1981.07	0.945883
															71773329	High	aLIEILATR	N-Term(iTRAQ4plex)	3.5951	1	1	Unique	Used	0.958464	2.00314	2	572.365	1143.72	0.0219079
															71773329	High	vFQEFIk	N-Term(iTRAQ4plex); K7(iTRAQ4plex)	3.30221	1	1	Unique	Used	0.877988	1.41393	2	599.849	1198.69	-13.9535
															71773329	High	cLIEILASR	N-Term(iTRAQ4plex); C1(Methylthio)	3.24011	1	1	Unique	Used	1.20521	1.30842	2	604.338	1207.67	1.69835
															71773329	High	sEIDLLNIR	N-Term(iTRAQ4plex)	3.23048	1	1	Unique	Used	0.984999	1.7007	2	608.854	1216.7	-0.8902
															71773329	High	eAILDIITSR	N-Term(iTRAQ4plex)	3.0499	1	1	Unique	Used	1.06909	1.31764	2	637.874	1274.74	-2.47751
															71773329	High	aLIEILATR	N-Term(iTRAQ4plex)	3.02542	1	1	Unique	Used	0.865847	1.32946	2	572.365	1143.72	1.08921
															71773329	High	sELDMLDIR	N-Term(iTRAQ4plex)	2.93363	1	1	Unique	Used	1.04509	1.26123	2	618.324	1235.64	-1.28816
9955963	ABCB6	ATP-binding cassette sub-family B member 6, mitochondrial [Homo sapiens]	2	2	1.57916	28.5824	0.665228	25.7689	93.8262	5.23	10.029	Mitochondrion	Auxiliary transport protein activity	Transport
															9955963	High	vTAGNDEVEAAAQAAGIHDAIMAFPEGYR	N-Term(iTRAQ4plex)	10.029	1	1	Unique	Used	1.89832	0.544014	3	1040.17	3118.49	-3.64486
															9955963	High	iDGQDISQVTQASLR	N-Term(iTRAQ4plex)	4.93263	1	1	Unique	Used	1.26	0.786441	2	887.973	1774.94	-1.12765
